# Supplementary material for: Palladium-catalyzed α-regioselective allylic amination of Morita–Baylis–Hillman acetates with simple aromatic amines
Source: Royal Society of Chemistry journal article supplement (doi:10.1039/c2ob25976a), 2012-01-01

**Supporting information**

**Palladium-Catalyzed  $\alpha$ -Regioselective Allylic Amination of  
Morita-Baylis-Hillman Acetates with Simple Aromatic Amines**

Yan Wang, †, ‡, Li Liu,\* †, Tao Zhang, †, ‡, Neng-Jun Zhong, †, ‡, Dong Wang, † and Yong-Jun Chen†

*†Beijing National Laboratory for Molecular Sciences (BNLMS), CAS Key Laboratory of Molecular Recognition and Function, Institute of Chemistry, Chinese Academy of Sciences, Beijing 100190, China ‡  
Graduate School of Chinese Academy of Sciences, Beijing 100049, China*

*lliu@iccas.ac.cn*

**1. General**

**2. Typical Experimental Procedures for Allylic Amination Reaction**

**3. The control experiment**

**4. NMR spectrum**

## 1. General

All reactions were carried out in oven dried flasks under nitrogen atmosphere under anhydrous conditions. Chemical shifts of all the  $^1\text{H}$  and  $^{13}\text{C}$  NMR were reported in  $\text{CDCl}_3$  with tetramethylsilane as an internal standard. IR spectra were recorded on the infrared spectrometer. Melting points were measured without correction. HRMS spectra were recorded on GCT-Mass Micromass spectrometer. Common reagents were purchased from commercial sources and were used without further purification. Column chromatography was performed using silica gel (200-300 mesh) eluting with ethyl acetate and petroleum ether. TLC was performed on glass-backed silica plates.

## 2. Typical Experimental Procedures for Allylic Amination Reaction

A solution of 5 mol%  $\text{Pd}_2(\text{dba})_3$  catalyst and 12.5 mol% ligand **L4** in 1 mL THF was stirred at 25 °C for 0.5 h, a solution of MBH acetates **1a** (0.2 mmol) and aniline **2a** (0.6 mmol) in 1 mL THF, and 0.6 mmol  $\text{K}_2\text{CO}_3$  (1M) were added. The reaction mixture was stirred at 25 °C and monitored by TLC until the starting material disappeared. Then the reaction mixture was extracted by ethyl acetate. The organic phase was dried by  $\text{Na}_2\text{SO}_4$ , filtered and evaporated to afford a mixture of the crude products. The crude product was purified by flash column chromatography over silica gel (eluent: PE/EA = 20 : 1) to give **3**.

## 3. The control experiment

In the control experiment, we found that the ratio of  $\alpha$  :  $\gamma$ -product did not change at different interval time (table 4). That demonstrated there is no conversion between the two regioselective isomers with the change of the time. The excellent regioselectivity was fully controlled by the introduction of the ligand **L4**.

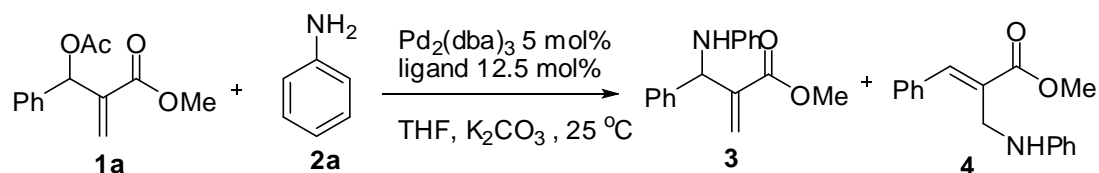

| Entry | t (h)       | Conv. (%) <sup>b</sup> | 3:4 <sup>c</sup> |
|-------|-------------|------------------------|------------------|
| 1     | <b>0.25</b> | 70                     | 21:1             |
| 2     | <b>0.5</b>  | 100                    | 21.5:1           |
| 3     | <b>1</b>    | 100                    | 22.0:1           |
| 4     | <b>2h</b>   | 100                    | 22.2:1           |
| 5     | <b>4h</b>   | 100                    | 21.7:1           |
| 6     | <b>12</b>   | 100                    | 22.5:1           |

<sup>a</sup> All reaction were performed with 0.1 mmol MBH acetates **1a**, 0.3 aniline **2a**, 0.3 mmol K<sub>2</sub>CO<sub>3</sub> (1M) in 2 ml THF at 25°C in nitrogen atmosphere. 10 mol% Pd catalyst and 12.5 mol% ligand **L3** were used. <sup>b</sup> The conversion of the reaction was determined by <sup>1</sup>H NMR of the crude reaction mixture. <sup>c</sup> Ratio determined by <sup>1</sup>H NMR of the crude reaction mixture.

### 4. NMR spectrum

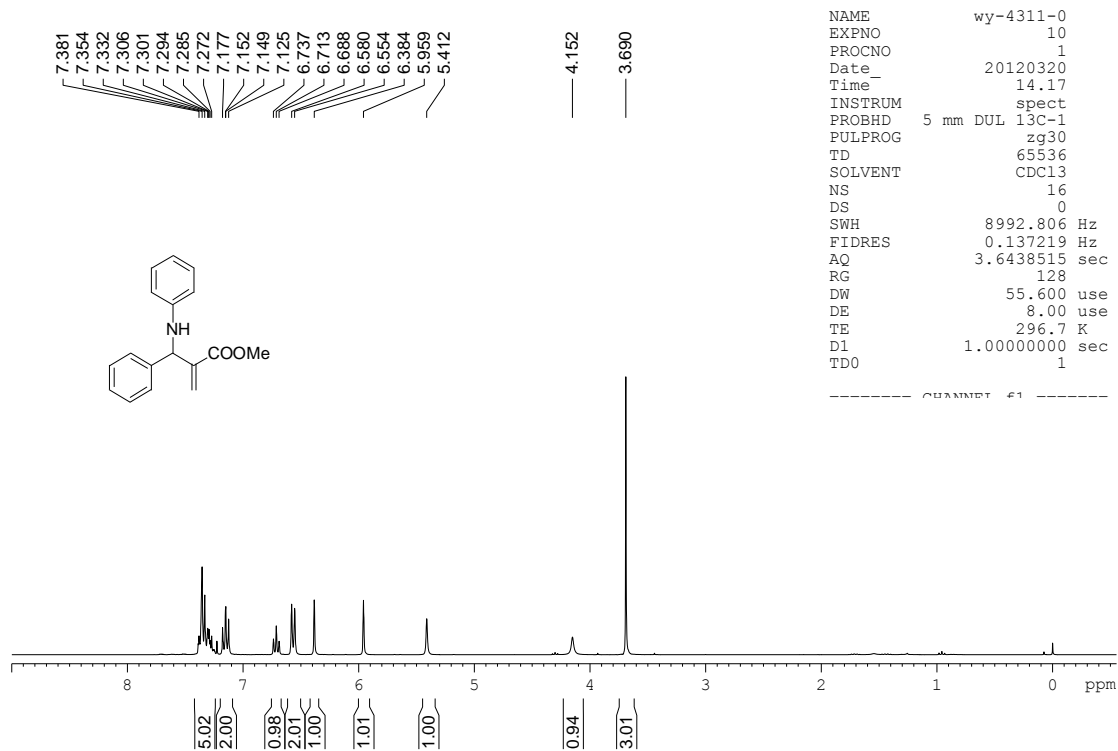

```

NAME      wy-4311-0
EXPNO    10
PROCNO   1
Date_    20120320
Time     14.17
INSTRUM  spect
PROBHD   5 mm DUL 13C-1
PULPROG  zg30
TD        65536
SOLVENT  CDCl3
NS        16
DS        0
SWH      8992.806 Hz
FIDRES   0.137219 Hz
AQ        3.6438515 sec
RG        128
DW        55.600 use
DE        8.00 use
TE        296.7 K
D1        1.00000000 sec
TD0       1
    
```

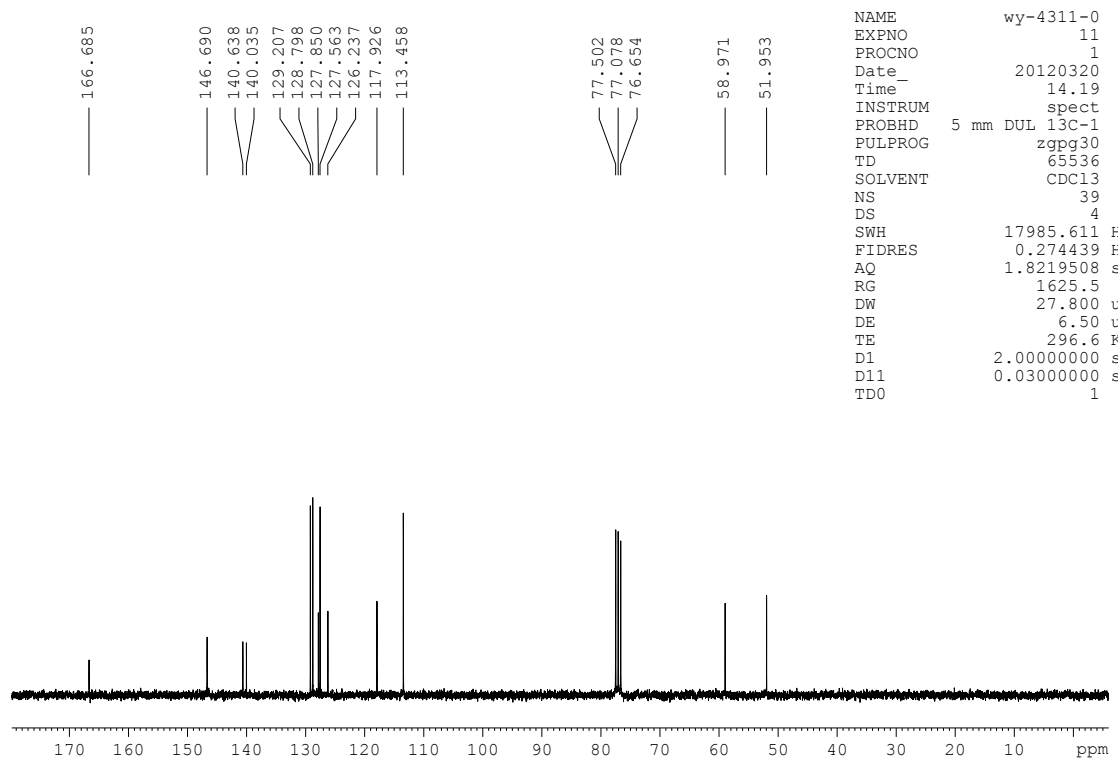

```

NAME      wy-4311-0
EXPNO    11
PROCNO   1
Date_    20120320
Time     14.19
INSTRUM  spect
PROBHD   5 mm DUL 13C-1
PULPROG  zgpg30
TD        65536
SOLVENT  CDCl3
NS        39
DS        4
SWH      17985.611 F
FIDRES   0.274439 F
AQ        1.8219508 s
RG        1625.5
DW        27.800 u
DE        6.50 u
TE        296.6 K
D1        2.00000000 s
D11       0.03000000 s
TD0       1
    
```

7.328  
7.303  
7.296  
7.289  
7.267  
7.178  
7.152  
7.125  
6.735  
6.711  
6.686  
6.583  
6.557  
5.932  
5.407

4.191  
4.178  
4.155  
4.139  
4.131  
4.115  
4.107  
4.092  
4.079

1.219  
1.196  
1.172

```

NAME      wy-4310-15
EXPNO     20
PROCNO    1
Date_     20120308
Time      17.52
INSTRUM   spect
PROBHD    5 mm DUL 13C-1
PULPROG   zg30
TD         65536
SOLVENT   CDCl3
NS         16
DS         0
SWH        8992.806
FIDRES     0.137219
AQ         3.6438515
RG         128
DW         55.600
DE         8.00
TE         295.6
    
```

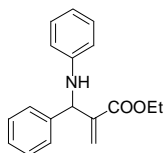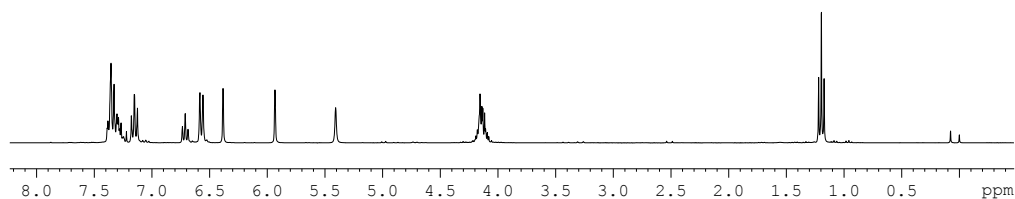

5.22  
1.99  
1.01  
2.03  
1.01  
1.00  
1.00  
3.14  
3.10

166.244  
146.771  
140.763  
140.331  
129.208  
128.761  
127.800  
127.589  
125.956  
117.895  
113.455

77.517  
77.094  
76.671  
60.838  
59.039

```

NAME      wy-4310-15
EXPNO     21
PROCNO    1
Date_     20120308
Time      17.55
INSTRUM   spect
PROBHD    5 mm DUL 13C-1
PULPROG   zgpg30
TD         65536
SOLVENT   CDCl3
NS         19
DS         4
SWH        17985.611
FIDRES     0.274439
AQ         1.8219508
RG         456.1
DW         27.800
DE         6.50
TE         295.8
    
```

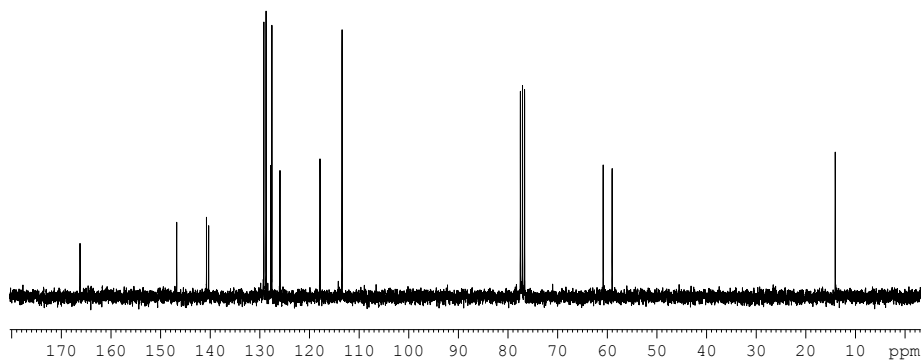

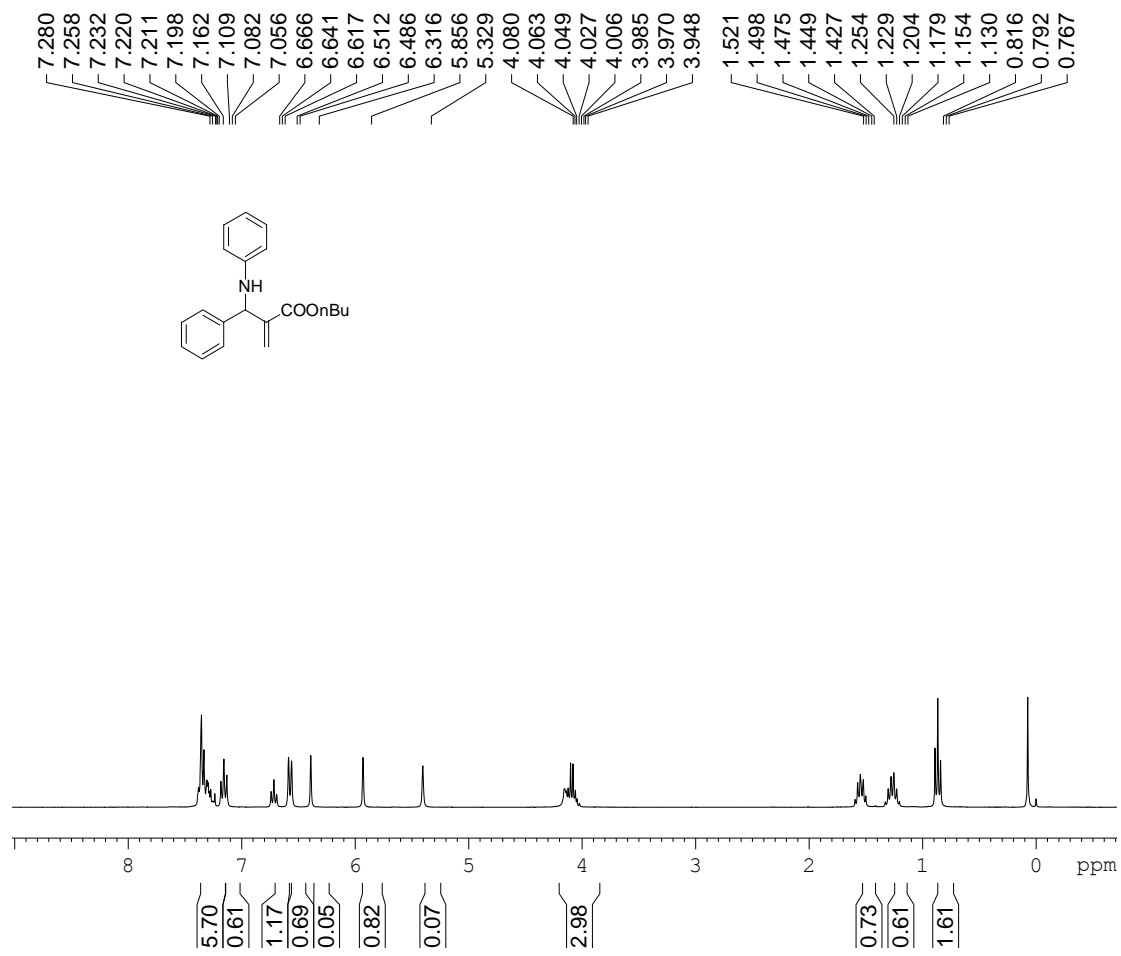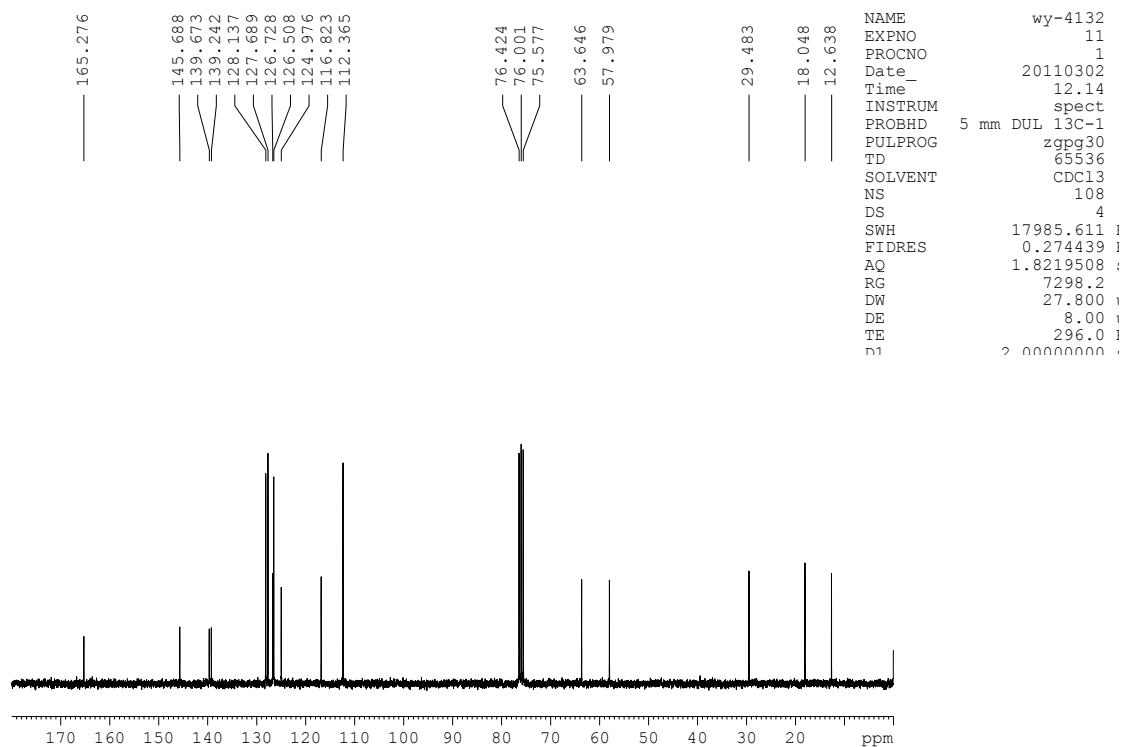

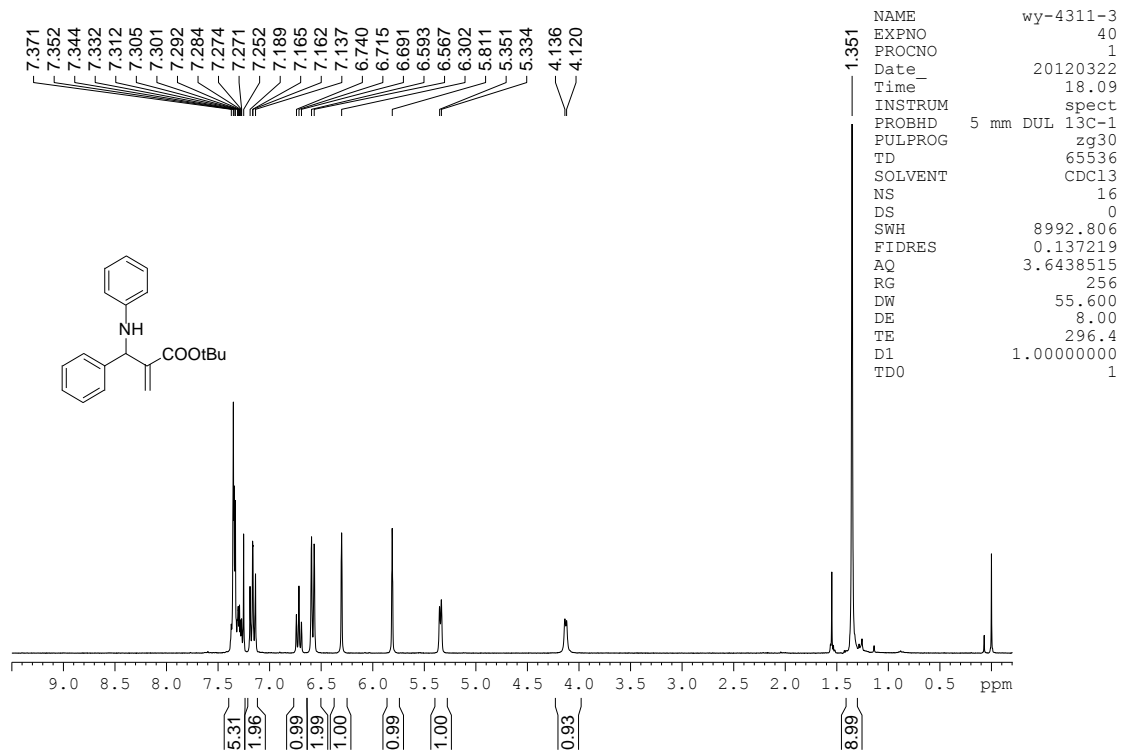

```

NAME          wy-4311-3
EXPNO         40
PROCNO        1
Date_         20120322
Time_         18.09
INSTRUM       spect
PROBHD        5 mm DUL 13C-1
PULPROG       zg30
TD            65536
SOLVENT       CDCl3
NS            16
DS            0
SWH           8992.806
FIDRES        0.137219
AQ            3.6438515
RG            256
DW            55.600
DE            8.00
TE            296.4
D1            1.00000000
TDO           1
    
```

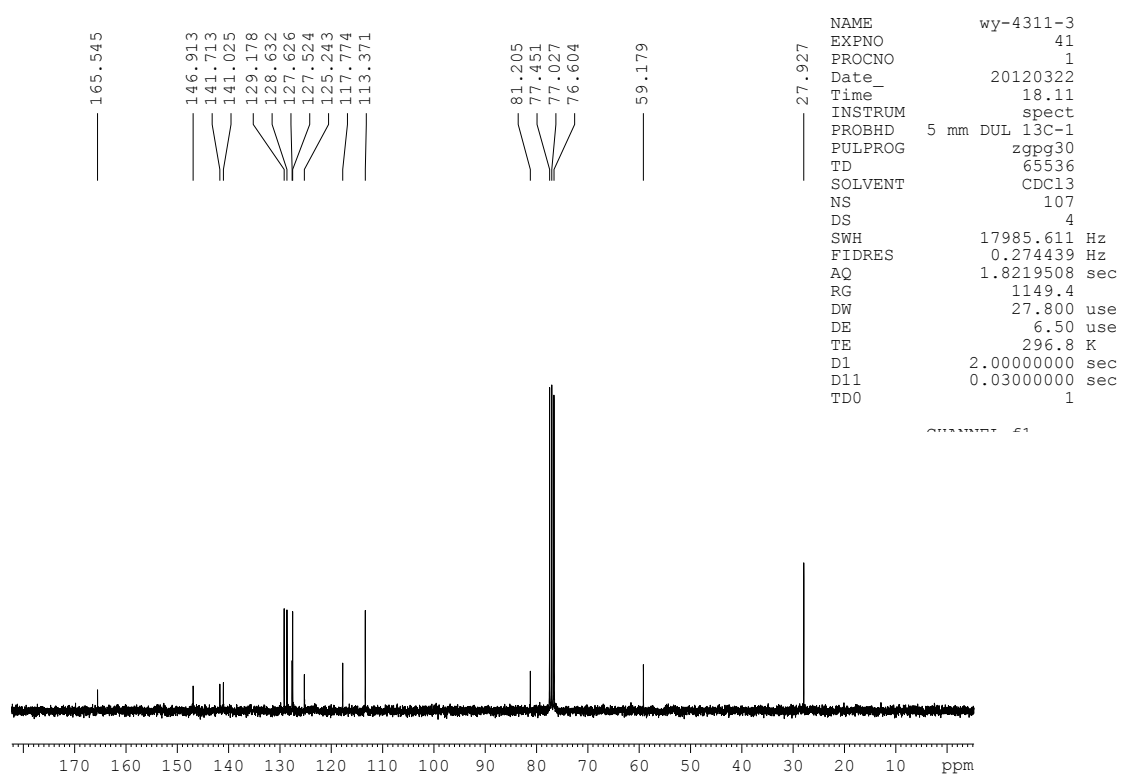

```

NAME          wy-4311-3
EXPNO         41
PROCNO        1
Date_         20120322
Time_         18.11
INSTRUM       spect
PROBHD        5 mm DUL 13C-1
PULPROG       zgpg30
TD            65536
SOLVENT       CDCl3
NS            107
DS            4
SWH           17985.611 Hz
FIDRES        0.274439 Hz
AQ            1.8219508 sec
RG            1149.4
DW            27.800 use
DE            6.50 use
TE            296.8 K
D1            2.00000000 sec
D11           0.03000000 sec
TDO           1
    
```

7.441  
7.435  
7.413  
7.387  
7.382  
7.375  
7.359  
7.341  
7.335  
7.317  
7.299  
7.290  
7.282  
7.207  
7.180  
7.156  
6.966  
6.962  
6.936  
6.766  
6.741  
6.717  
6.634  
6.614  
6.131  
5.509  
5.493  
4.205  
4.190

```

NAME          wy-4311-4
EXPNO         30
PROCNO        1
Date_         20120319
Time_         21.49
INSTRUM       spect
PROBHD        5 mm DUL 13C-1
PULPROG       zg30
TD            65536
SOLVENT       CDCl3
NS            16
DS            0
SWH           8992.806
FIDRES        0.137219
AQ            3.6438515
RG            128
DW            55.600
DE            8.00
TE            296.3
    
```

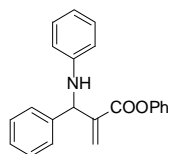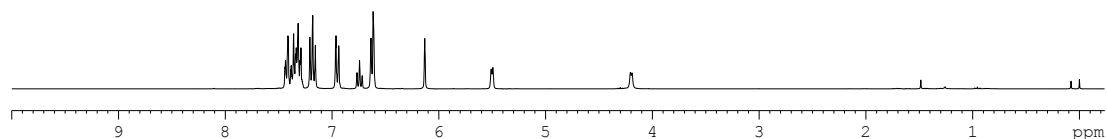

164.805  
150.545  
146.665  
140.513  
139.852  
129.428  
129.306  
128.921  
128.031  
127.734  
127.662  
125.932  
121.543  
118.129  
113.535

77.524  
77.101  
76.677

59.233

```

NAME          wy-4311-4
EXPNO         31
PROCNO        1
Date_         20120319
Time_         21.52
INSTRUM       spect
PROBHD        5 mm DUL 13C-1
PULPROG       zgpg30
TD            65536
SOLVENT       CDCl3
NS            21
DS            4
SWH           17985.611
FIDRES        0.274439
AQ            1.8219508
RG            574.7
DW            27.800
DE            6.50
TE            296.5
    
```

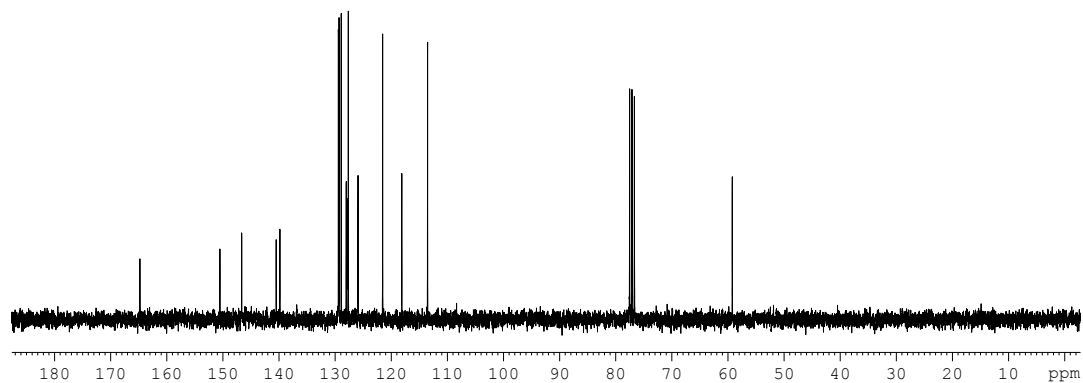



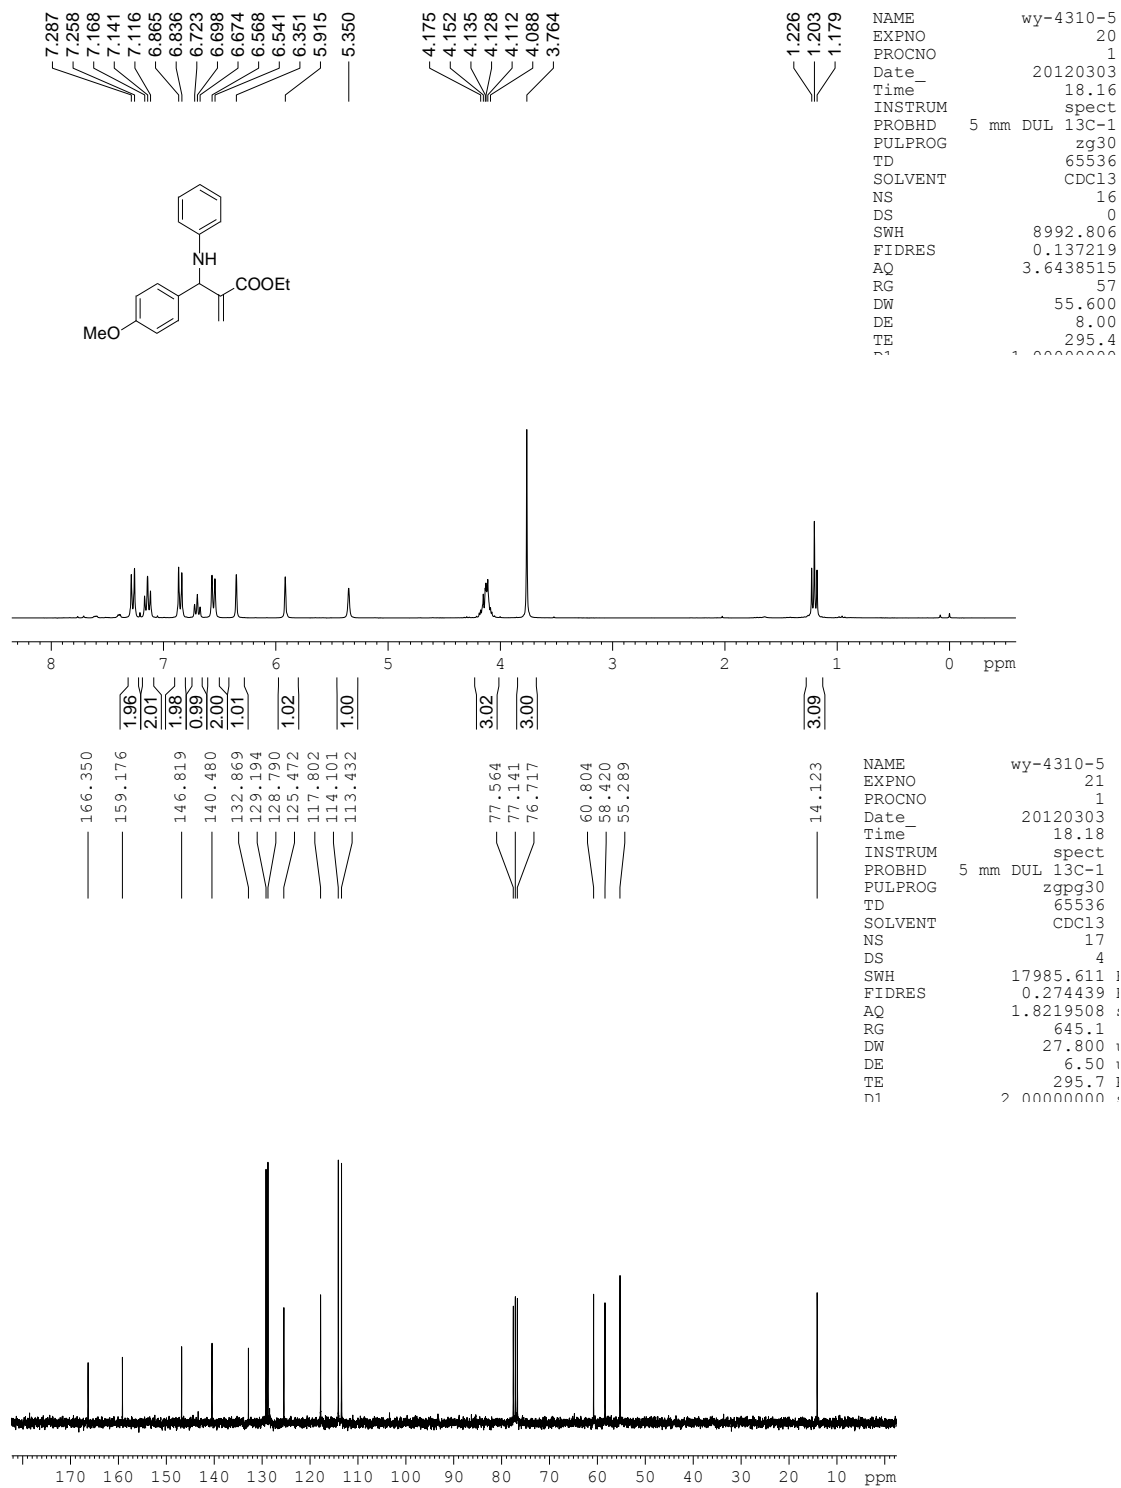

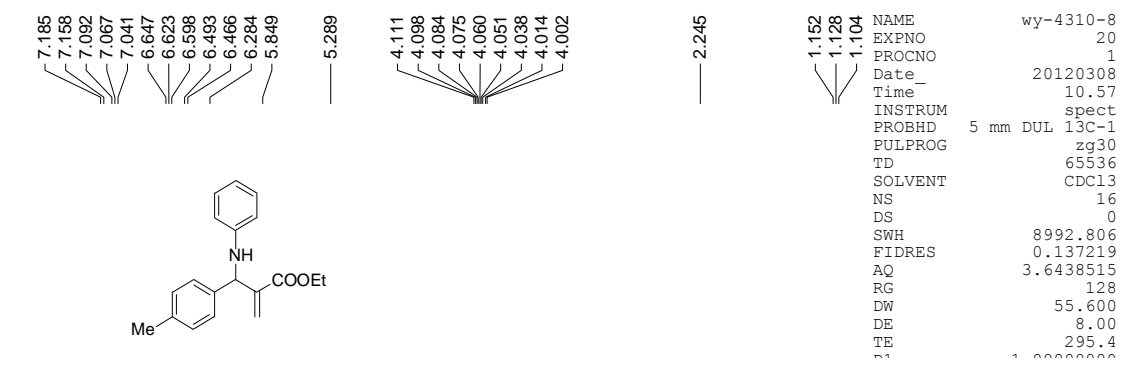

```

NAME      wy-4310-8
EXPNO     20
PROCNO    1
Date_     20120308
Time      10.57
INSTRUM   spect
PROBHD    5 mm DUL 13C-1
PULPROG   zg30
TD         65536
SOLVENT   CDCl3
NS         16
DS         0
SWH        8992.806
FIDRES     0.137219
AQ         3.6438515
RG         128
DW         55.600
DE         8.00
TE         295.4
n1         1
    
```

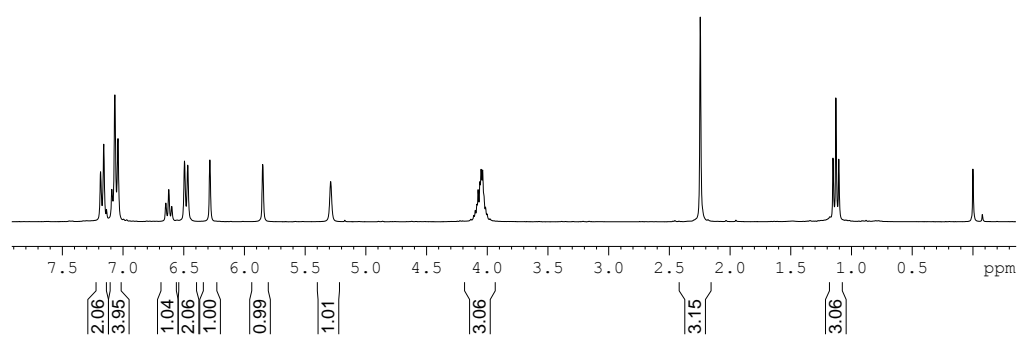

```

NAME      wy-4310-8
EXPNO     21
PROCNO    1
Date_     20120308
Time      11.00
INSTRUM   spect
PROBHD    5 mm DUL 13C-1
PULPROG   zgpg30
TD         65536
SOLVENT   CDCl3
NS         25
DS         4
SWH        17985.611
FIDRES     0.274439
AQ         1.8219508
RG         512
DW         27.800
DE         6.50
TE         295.7
n1         2
    
```

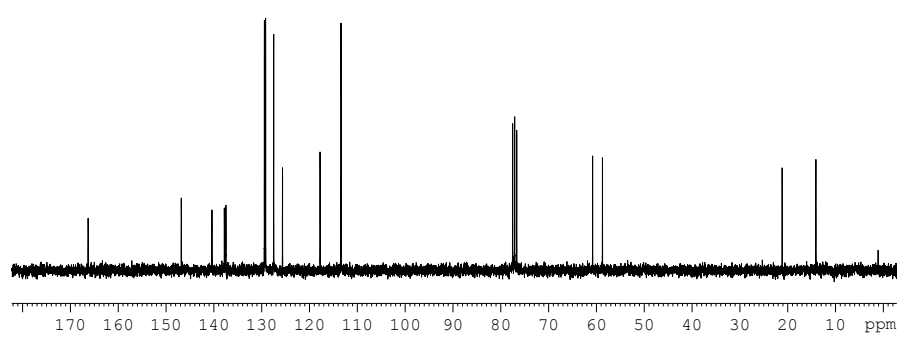

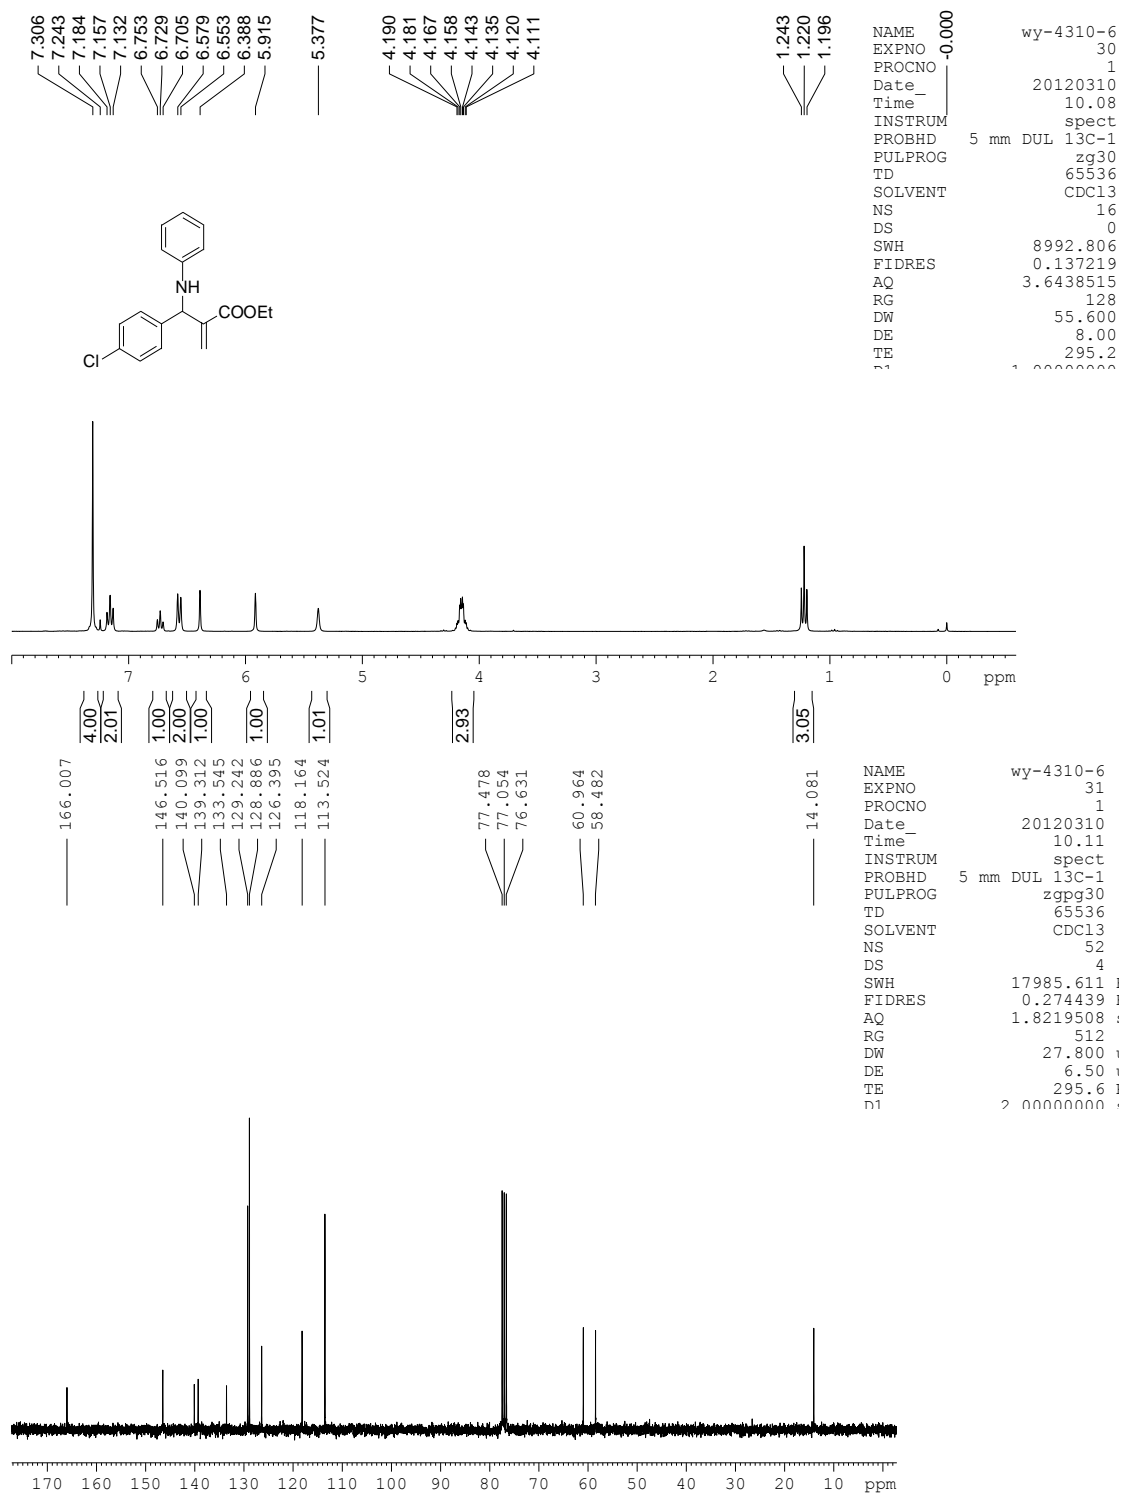

7.471  
7.443  
7.268  
7.244  
7.240  
7.184  
7.158  
7.132  
6.753  
6.729  
6.705  
6.578  
6.551  
6.388  
5.912  
5.372  
5.354  
4.191  
4.182  
4.166  
4.160  
4.143  
4.137  
4.120  
4.112

1.245  
1.222  
1.198

```

NAME      wy-4310-11
EXPNO    20
PROCNO   1
Date_    20120308
Time_    10.23
INSTRUM  spect
PROBHD   5 mm DUL 13C-1
PULPROG  zg30
TD       65536
SOLVENT  CDCl3
NS       16
DS       0
SWH      8992.806
FIDRES   0.137219
AQ       3.6438515
RG       128
DW       55.600
DE       8.00
TE       295.5
    
```

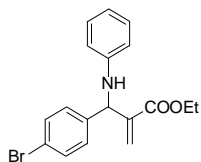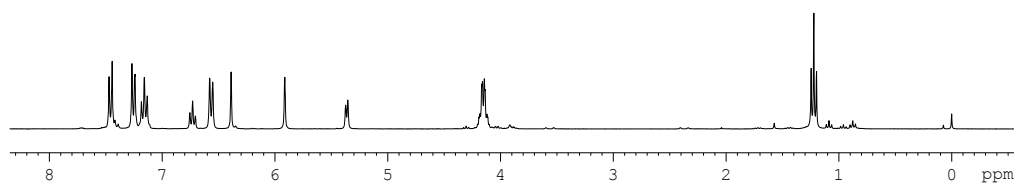

1.98  
2.10  
2.03  
1.01  
1.98  
1.03  
1.00  
1.02

3.00

3.05

166.000  
146.529  
140.076  
139.874  
131.858  
129.260  
126.466  
121.701  
118.195  
113.554

77.531  
77.108  
76.684

60.992  
58.554

14.109

```

NAME      wy-4311-9
EXPNO    20
PROCNO   1
Date_    20120319
Time_    21.43
INSTRUM  spect
PROBHD   5 mm DUL 13C-1
PULPROG  zgpg30
TD       65536
SOLVENT  CDCl3
NS       22
DS       4
SWH      17985.611
FIDRES   0.274439
AQ       1.8219508
RG       812.7
DW       27.800
DE       6.50
TE       296.8
    
```

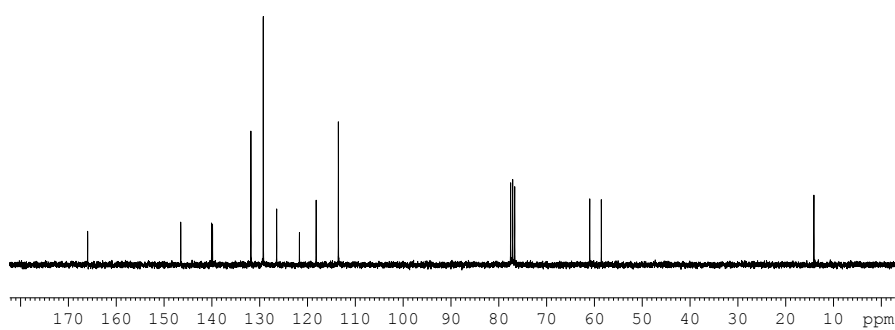

7.611  
7.588  
7.585  
7.396  
7.370  
7.365  
7.300  
7.297  
7.275  
7.272  
7.254  
7.175  
7.150  
7.148  
7.123  
7.123  
6.739  
6.715  
6.691  
6.575  
6.550  
6.438  
5.819  
5.800  
5.768  
4.229  
4.217  
4.208  
4.193  
4.185  
4.169  
4.161  
4.146  
4.138  
4.125  
4.080  
4.061

1.230  
1.206  
1.183

|         |                |
|---------|----------------|
| NAME    | wy-4311-10     |
| EXPNO   | 30             |
| PROCNO  | 1              |
| Date_   | 20120322       |
| Time    | 18.22          |
| INSTRUM | spect          |
| PROBHD  | 5 mm DUL 13C-1 |
| PULPROG | zg30           |
| TD      | 65536          |
| SOLVENT | CDCl3          |
| NS      | 16             |
| DS      | 0              |
| SWH     | 8992.806       |
| FIDRES  | 0.137219       |
| AQ      | 3.6438515      |
| RG      | 322.5          |
| DW      | 55.600         |
| DE      | 8.00           |
| TE      | 296.5          |
| D1      | 1.00000000     |
| TDO     | 1              |

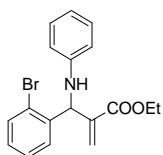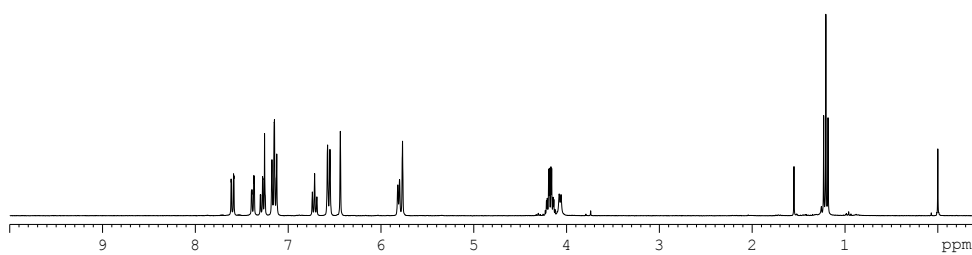

166.065  
146.596  
139.868  
139.622  
133.322  
129.244  
129.187  
128.472  
127.688  
127.408  
124.653  
118.025  
113.284  
77.450  
77.027  
76.603  
60.985  
57.859  
14.051

|         |                |
|---------|----------------|
| NAME    | wy-4311-10     |
| EXPNO   | 31             |
| PROCNO  | 1              |
| Date_   | 20120322       |
| Time    | 18.24          |
| INSTRUM | spect          |
| PROBHD  | 5 mm DUL 13C-1 |
| PULPROG | zgpg30         |
| TD      | 65536          |
| SOLVENT | CDCl3          |
| NS      | 84             |
| DS      | 4              |
| SWH     | 17985.611 H    |
| FIDRES  | 0.274439 H     |
| AQ      | 1.8219508 s    |
| RG      | 2298.8         |
| DW      | 27.800 u       |
| DE      | 6.50 u         |
| TE      | 296.8 K        |
| D1      | 2.00000000 s   |
| D11     | 0.03000000 s   |
| TDO     | 1              |

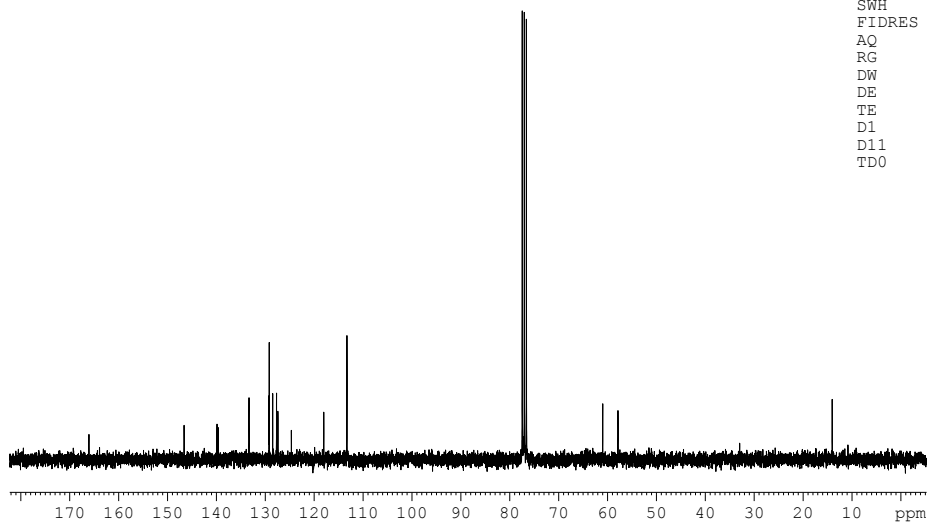

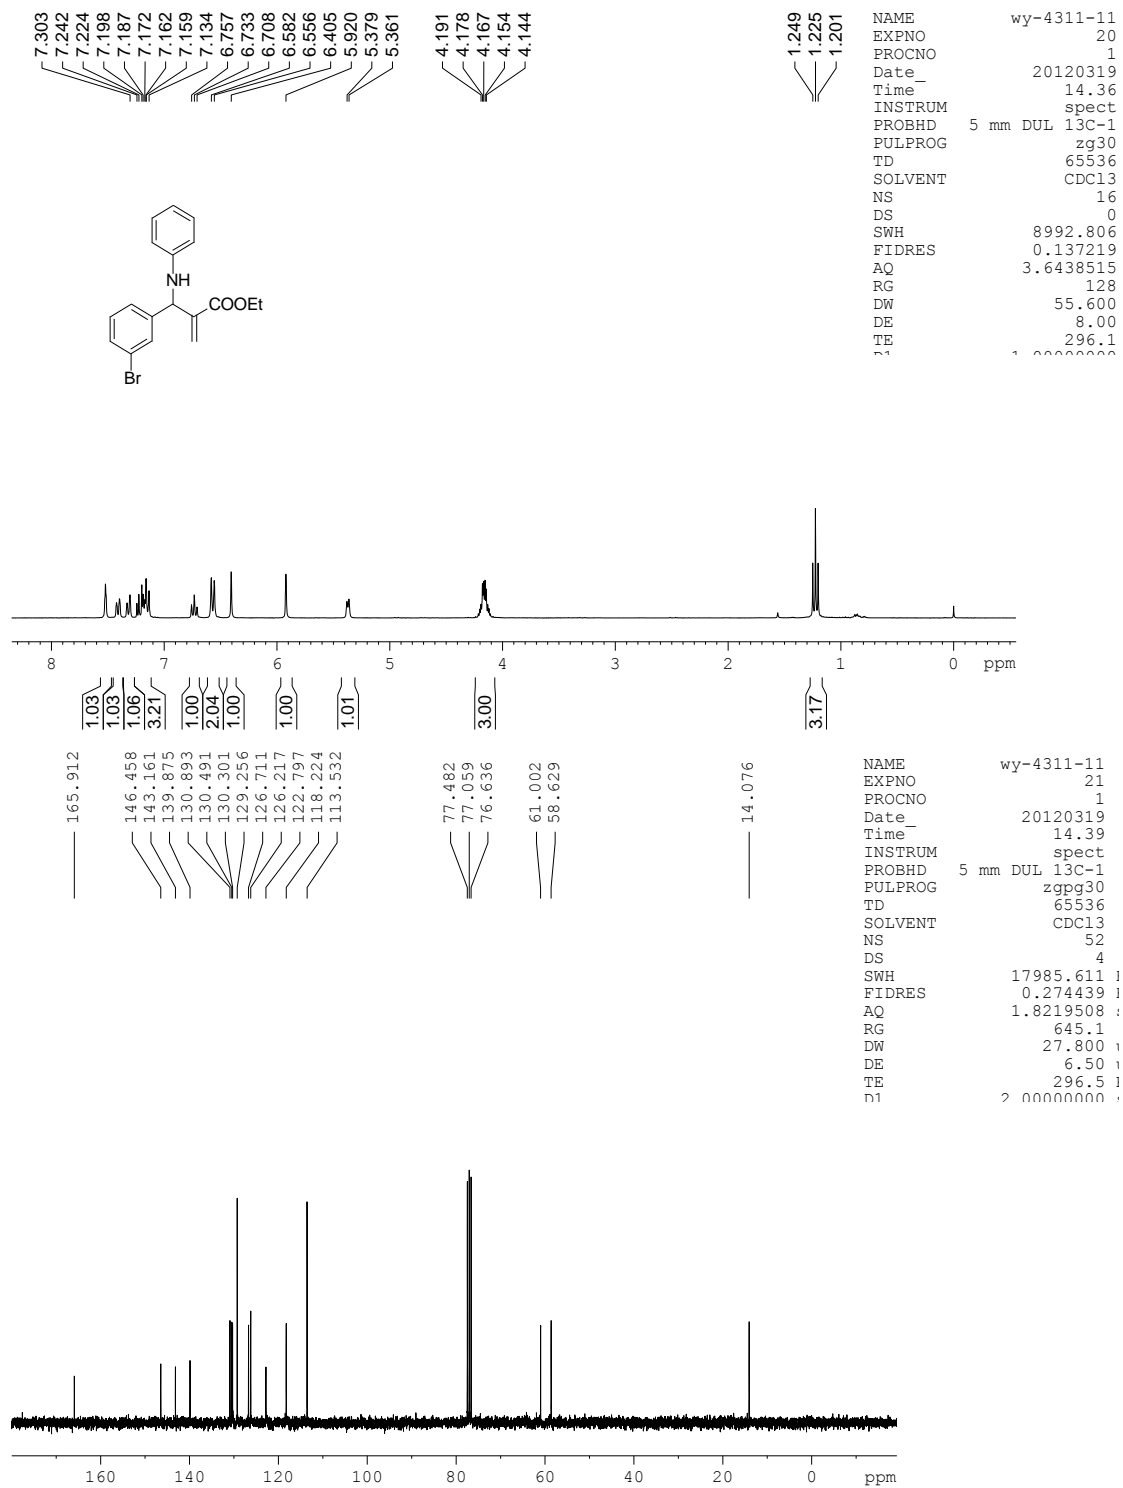

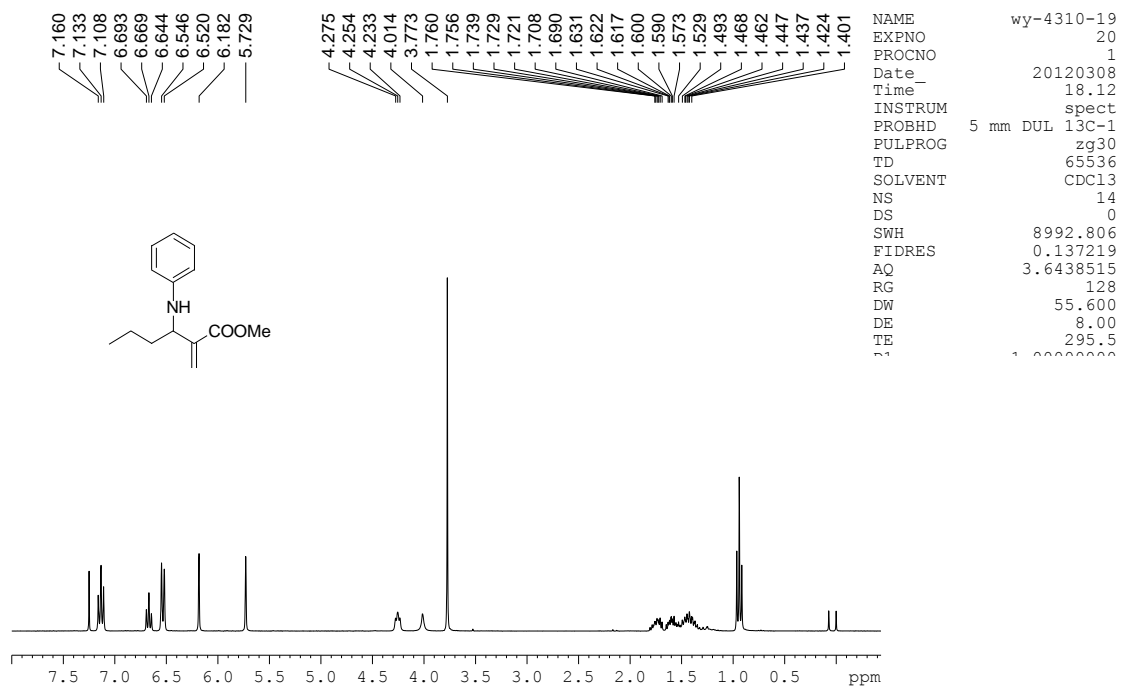

NAME wy-4310-19  
 EXPNO 20  
 PROCNO 1  
 Date\_ 20120308  
 Time\_ 18.12  
 INSTRUM spect  
 PROBHD 5 mm DUL 13C-1  
 PULPROG zg30  
 TD 65536  
 SOLVENT CDCl3  
 NS 14  
 DS 0  
 SWH 8992.806  
 FIDRES 0.137219  
 AQ 3.6438515  
 RG 128  
 DW 55.600  
 DE 8.00  
 TE 295.5  
 \* 1 000000000

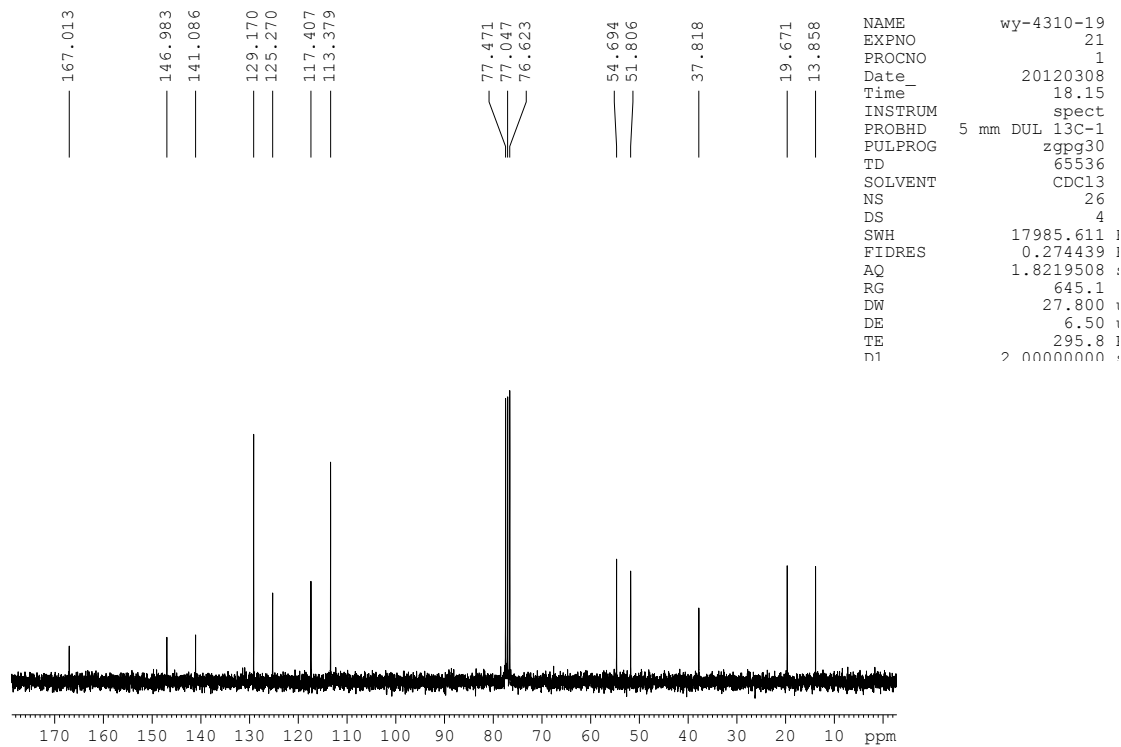

NAME wy-4310-19  
 EXPNO 21  
 PROCNO 1  
 Date\_ 20120308  
 Time\_ 18.15  
 INSTRUM spect  
 PROBHD 5 mm DUL 13C-1  
 PULPROG zgpg30  
 TD 65536  
 SOLVENT CDCl3  
 NS 26  
 DS 4  
 SWH 17985.611  
 FIDRES 0.274439  
 AQ 1.8219508  
 RG 645.1  
 DW 27.800  
 DE 6.50  
 TE 295.8  
 n1 2 000000000

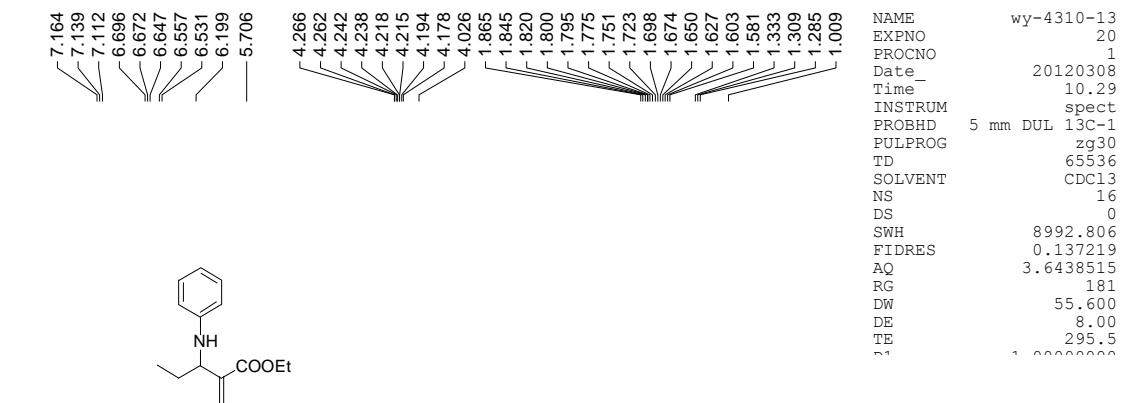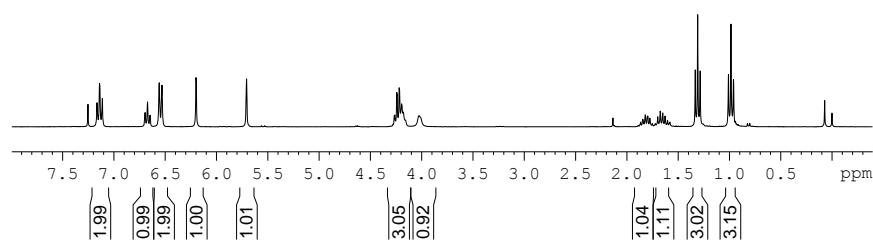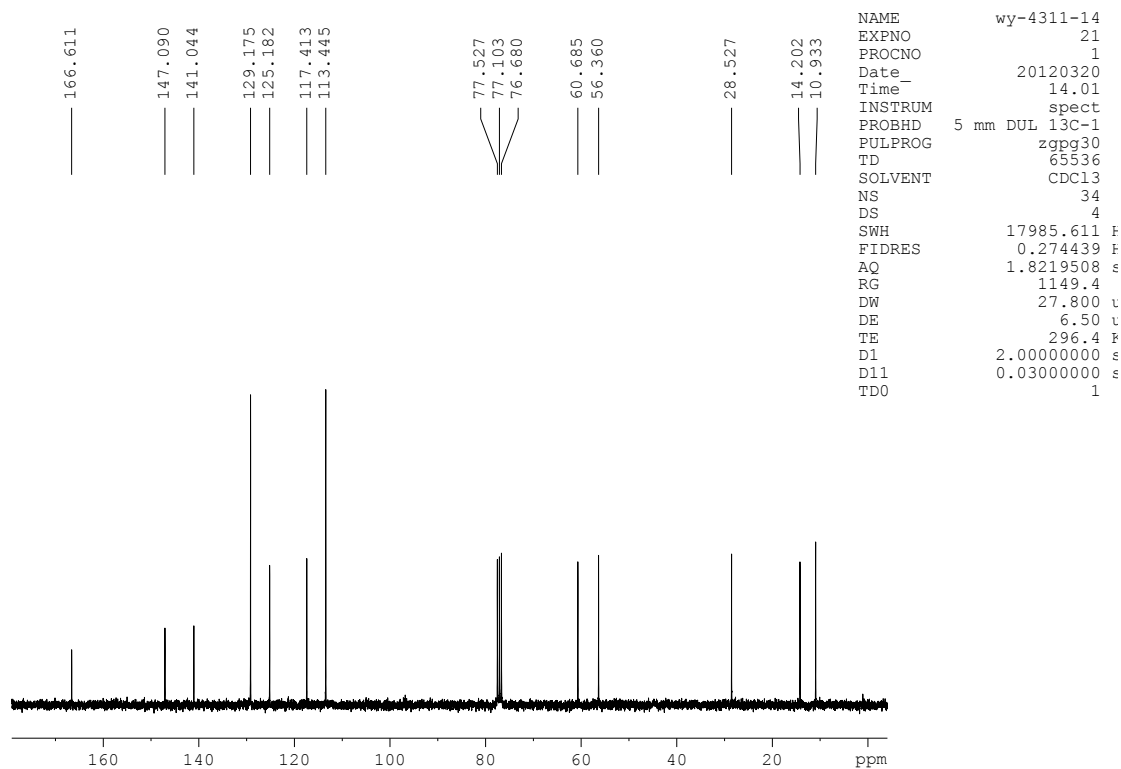



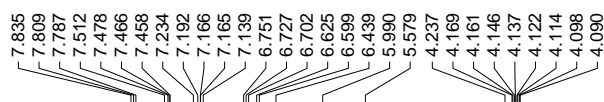

```

1.214
1.190
1.166 NAME wy-4310-10
EXPNO 20
PROCNO 1
Date_ 20120308
Time 10.34
INSTRUM spect
PROBHD 5 mm DUL 13C-1
PULPROG zg30
TD 65536
SOLVENT CDCl3
NS 16
DS 0
SWH 8992.806
FIDRES 0.137219
AQ 3.6438515
RG 181
DW 55.600
DE 8.00
TE 295.5
n1 1 000000000
    
```

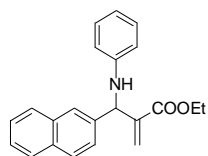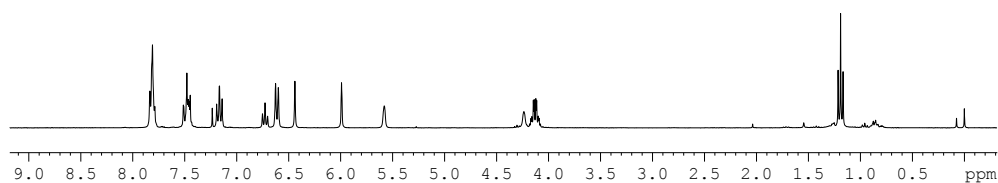

4.07  
3.13  
2.02  
1.01  
2.05  
1.00  
1.00  
1.01

0.88  
2.08

3.11

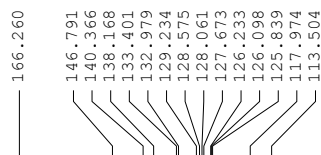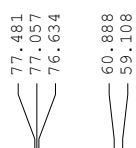

```

14.081 NAME wy-4310-10
EXPNO 21
PROCNO 1
Date_ 20120308
Time 10.37
INSTRUM spect
PROBHD 5 mm DUL 13C-1
PULPROG zgpg30
TD 65536
SOLVENT CDCl3
NS 43
DS 4
SWH 17985.611
FIDRES 0.274439
AQ 1.8219508
RG 574.7
DW 27.800
DE 6.50
TE 295.8
n1 2 000000000
    
```

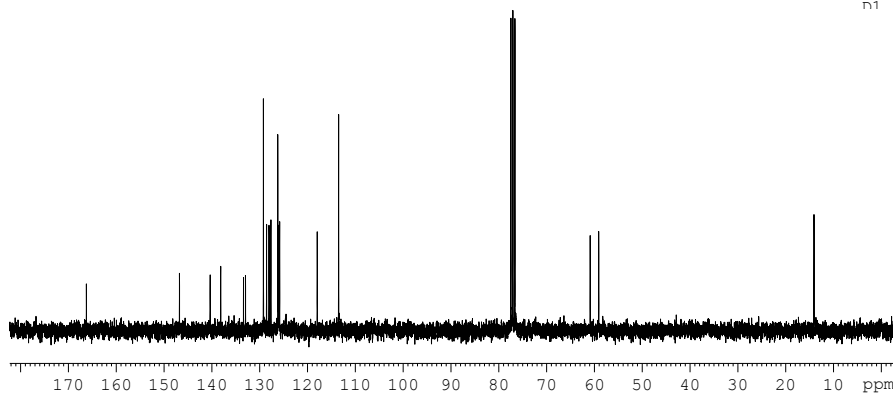

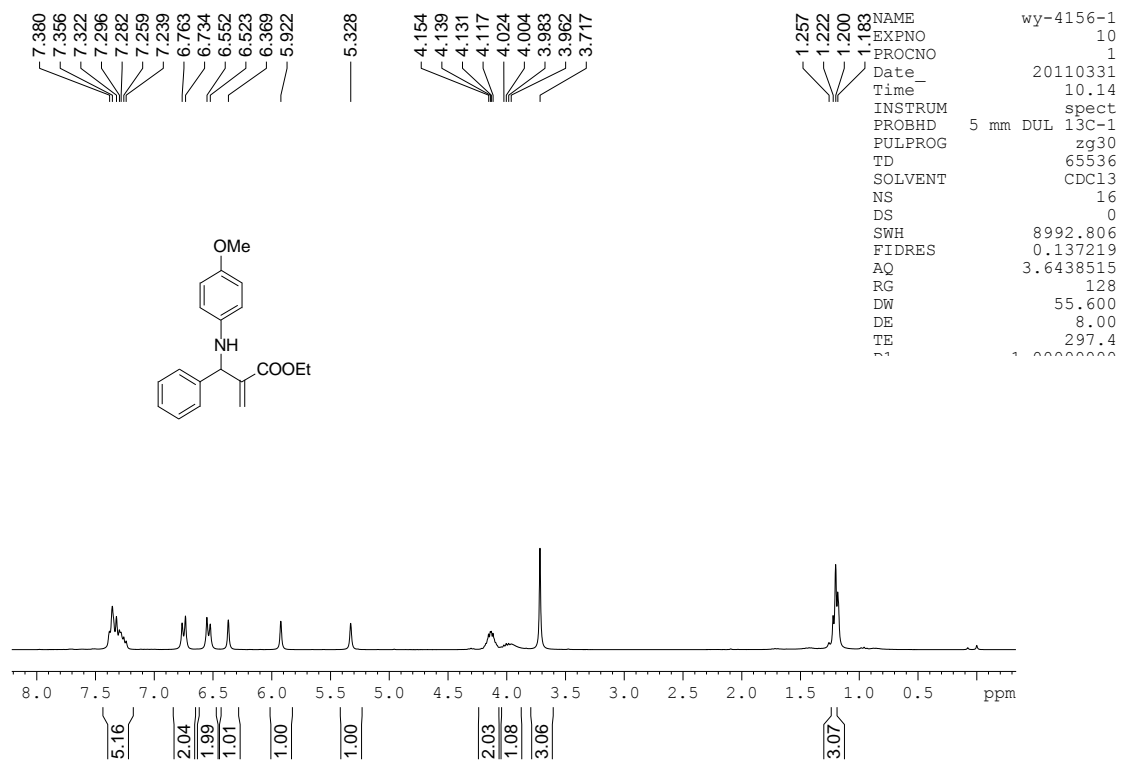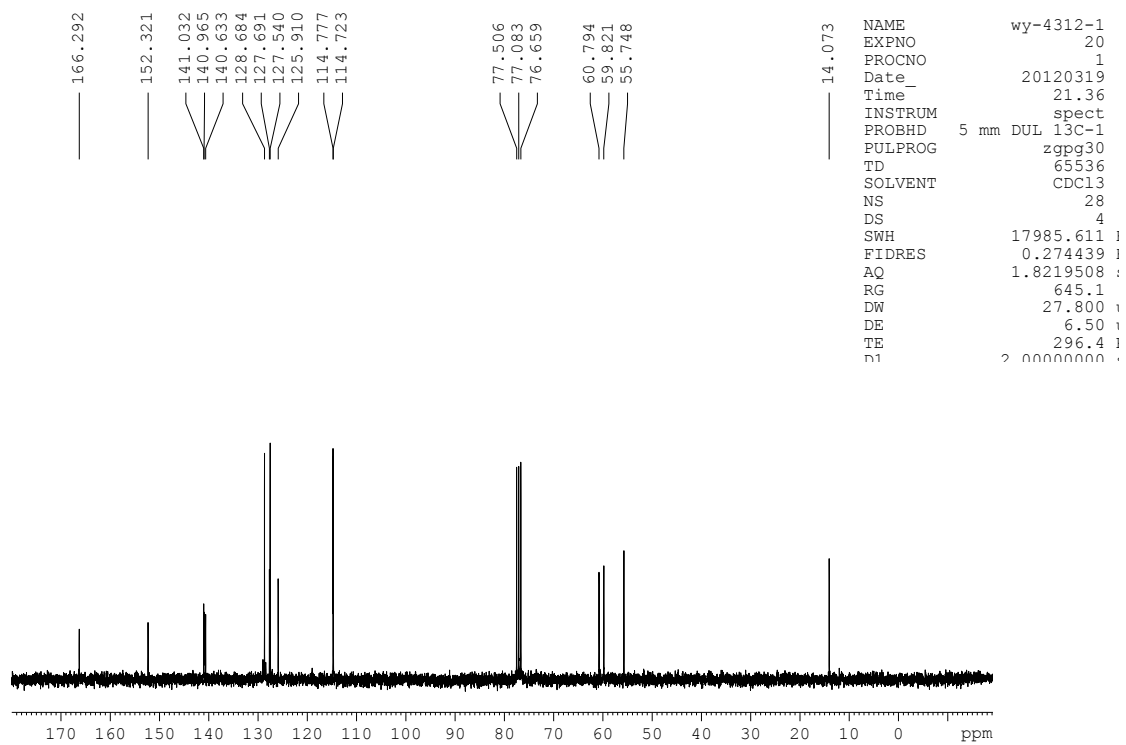

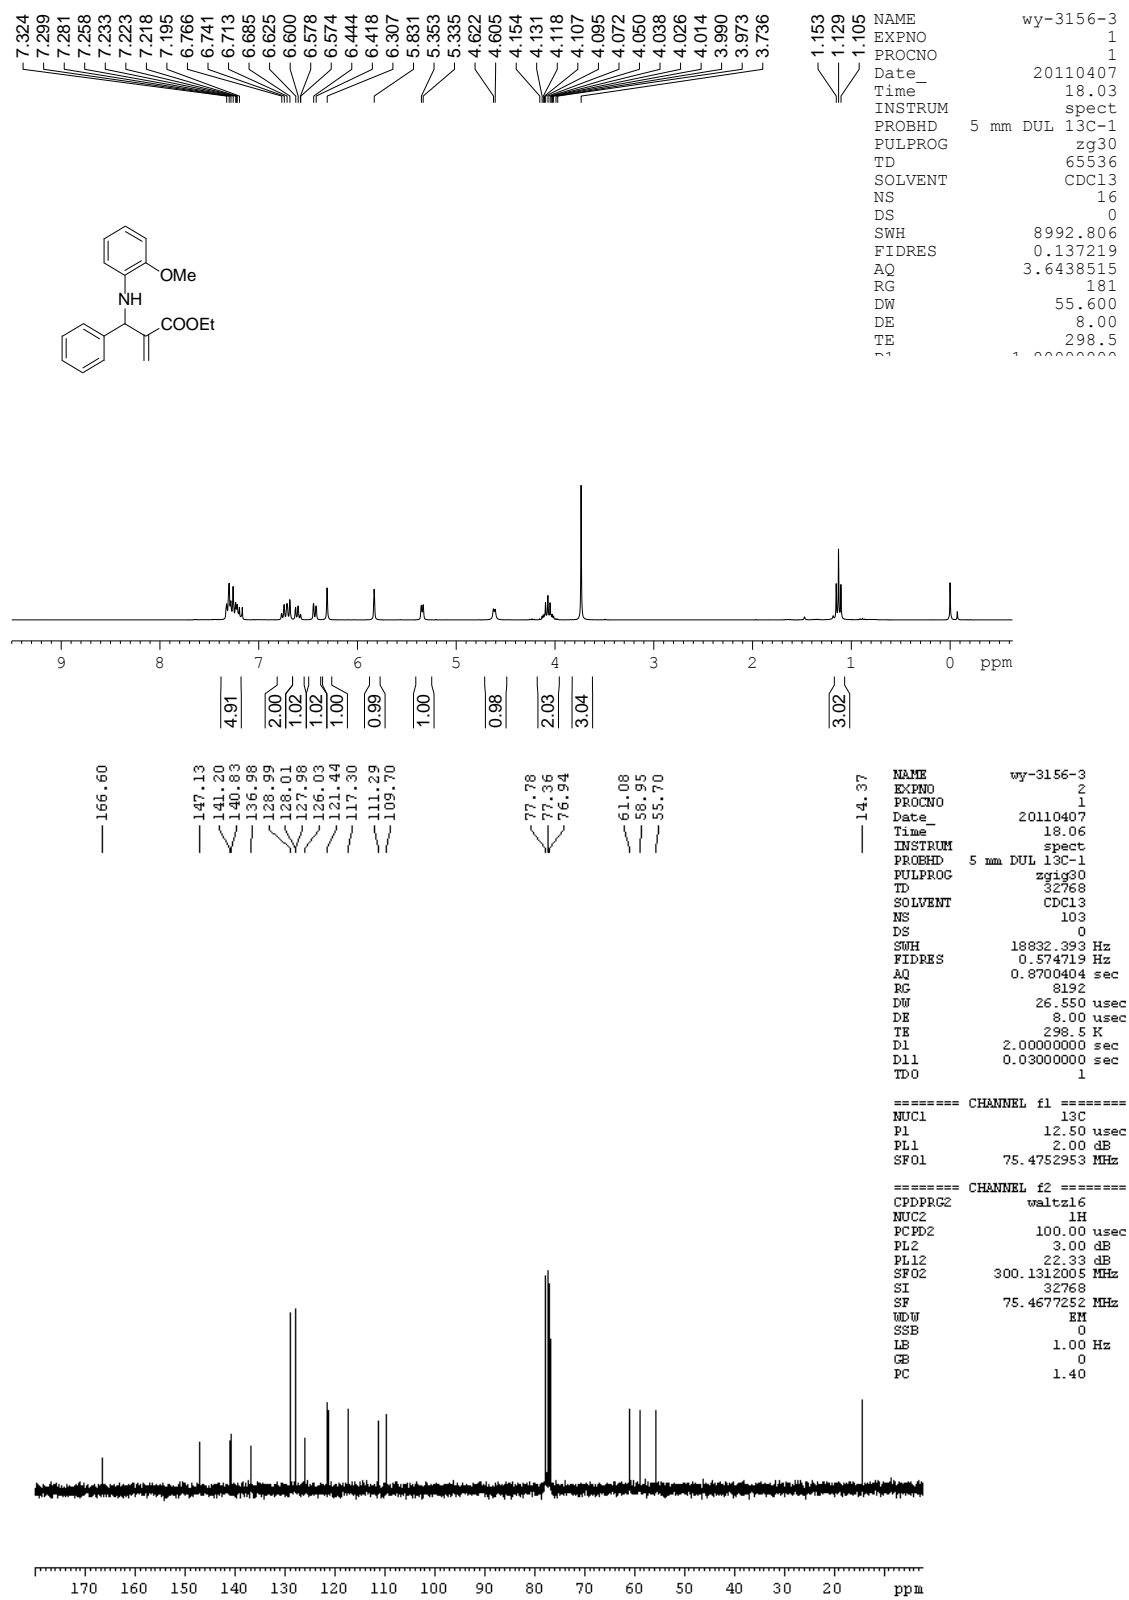

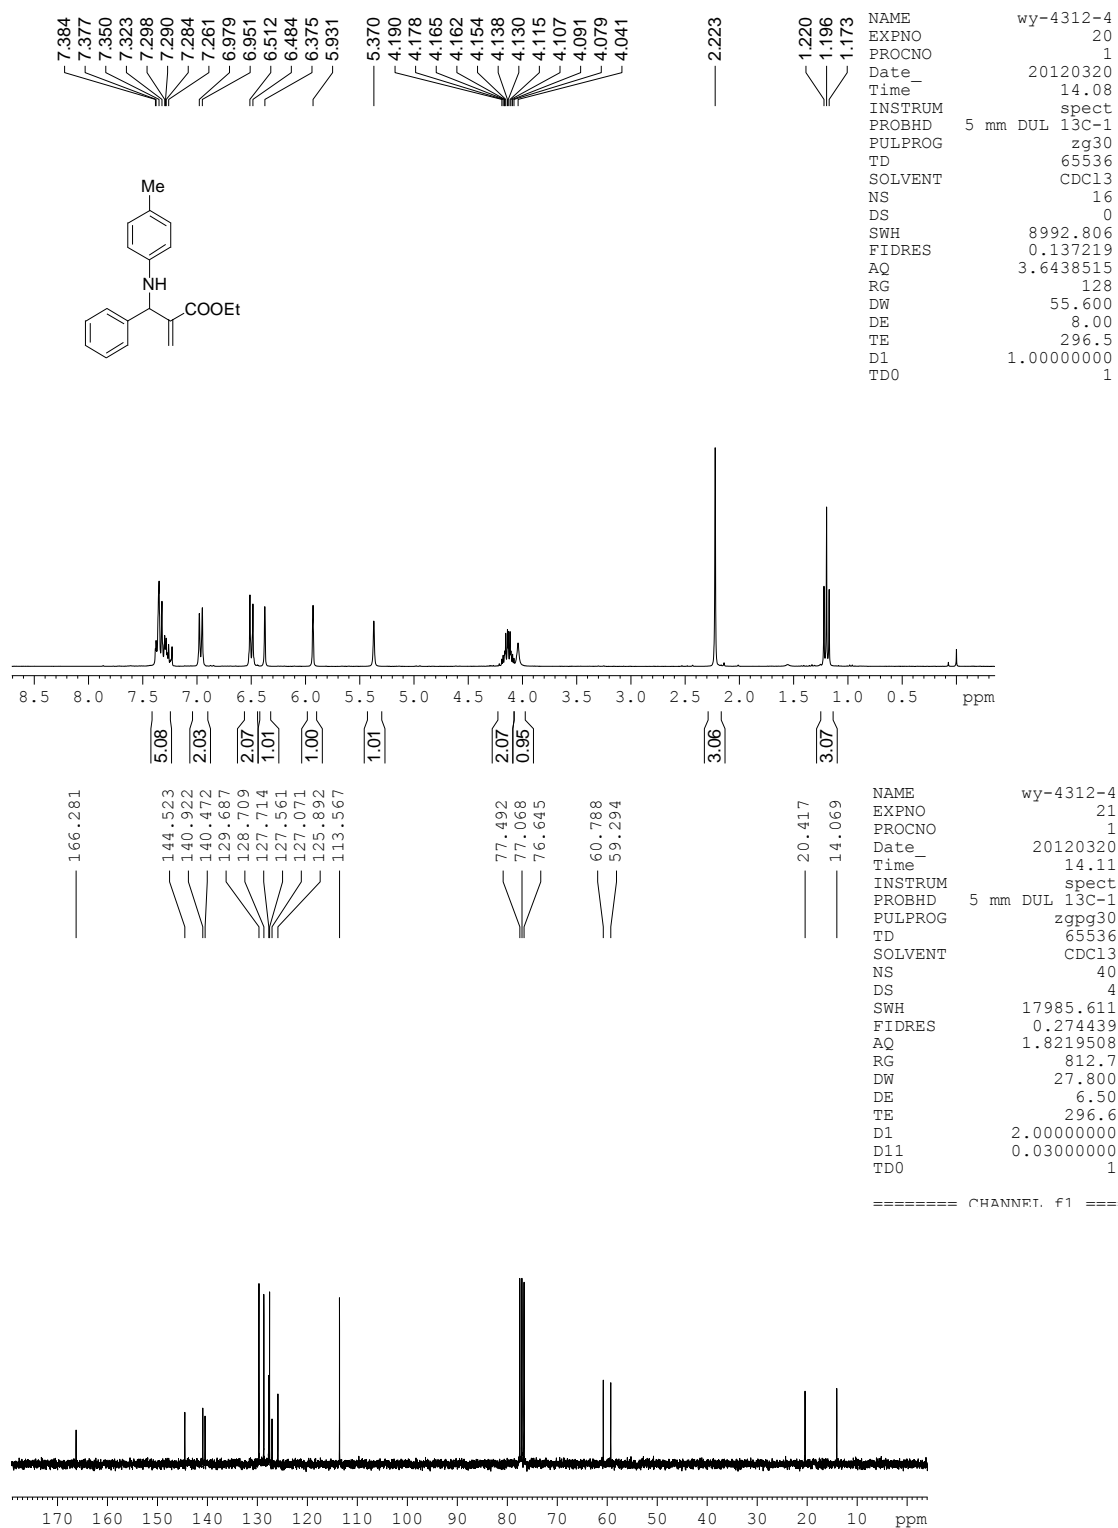

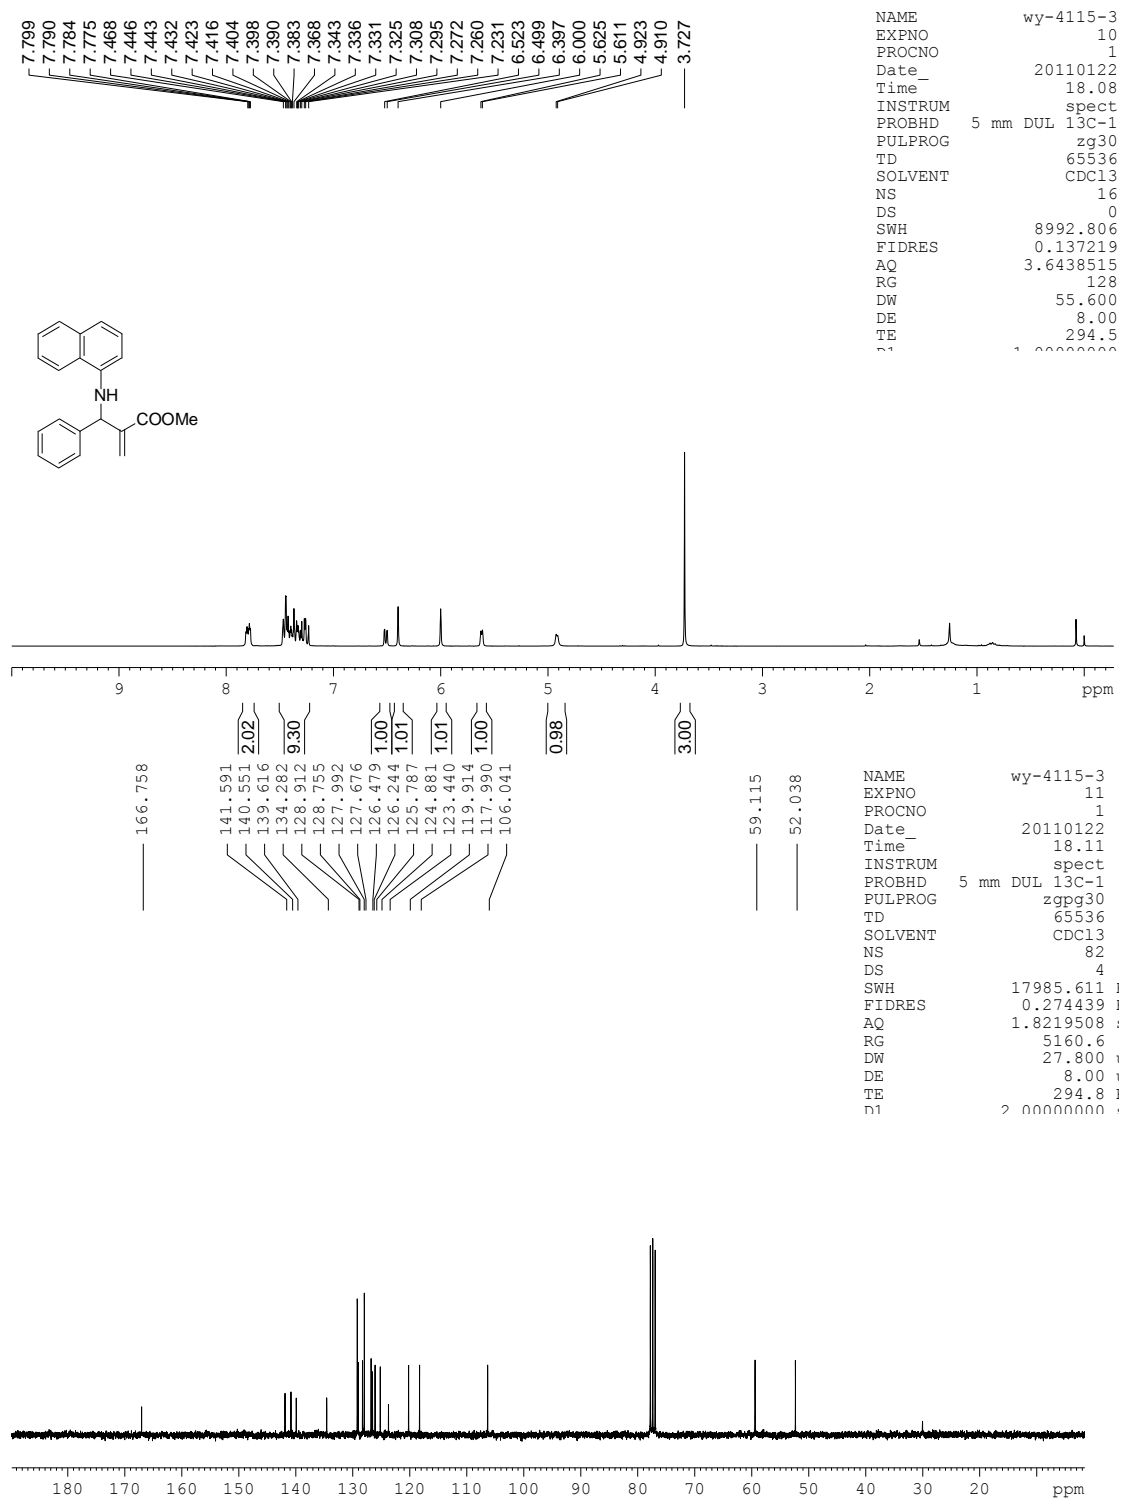

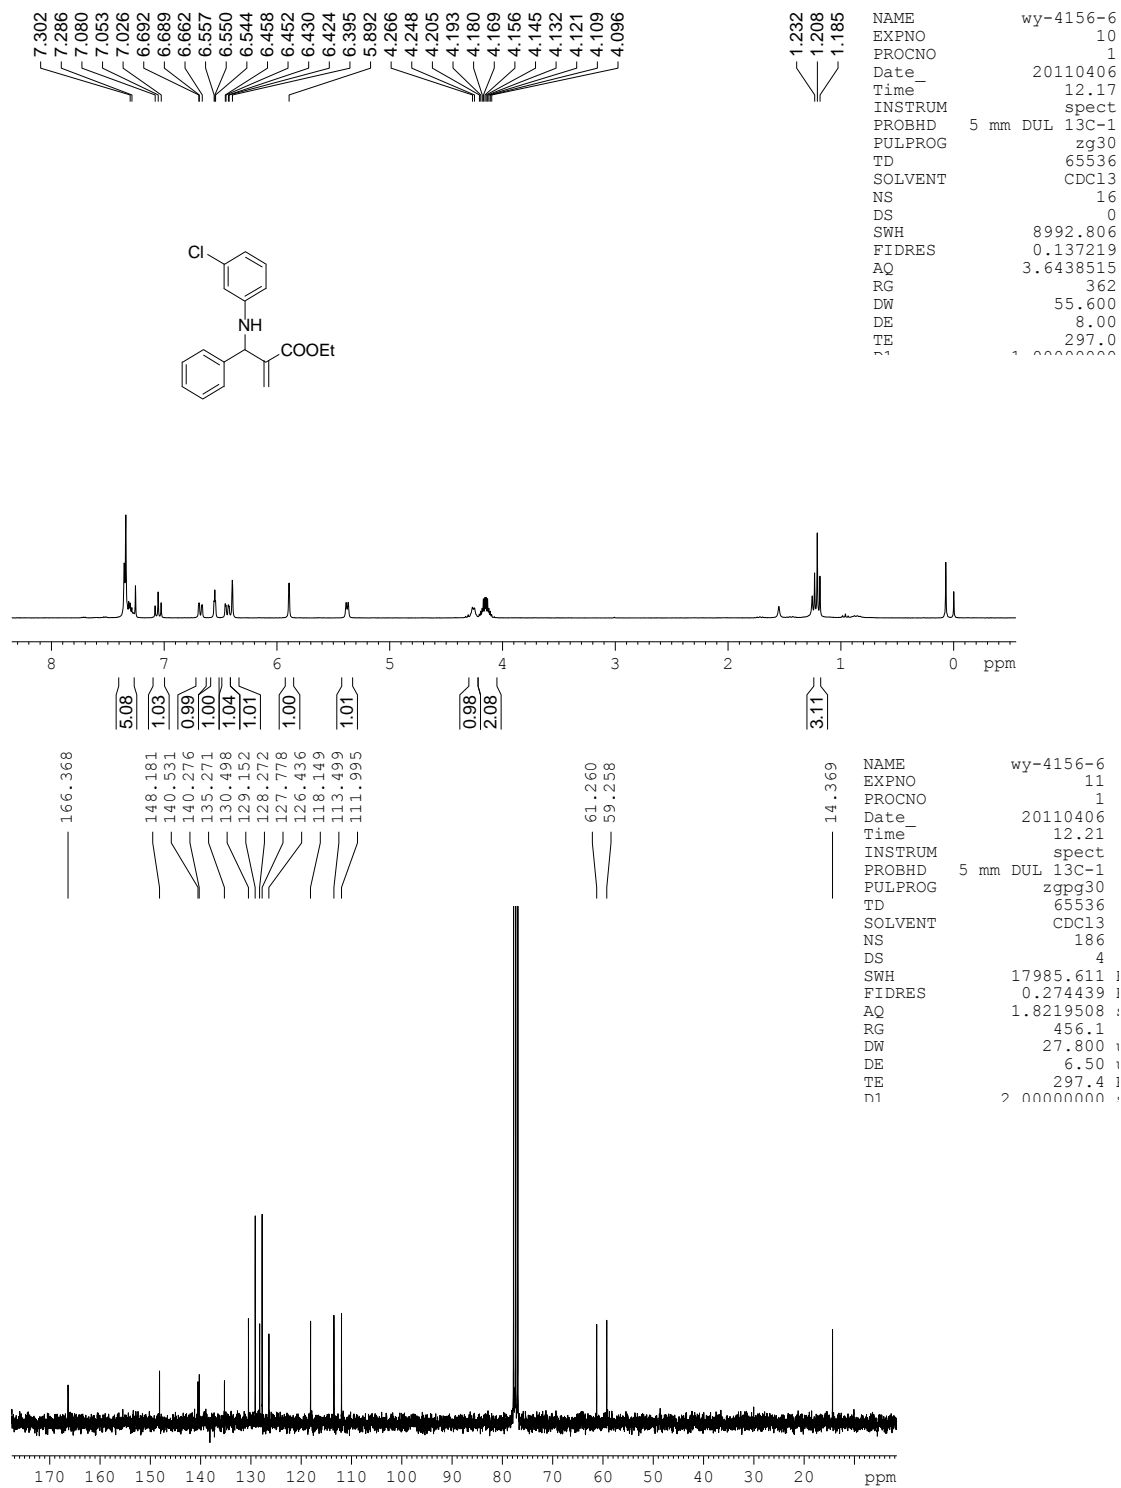

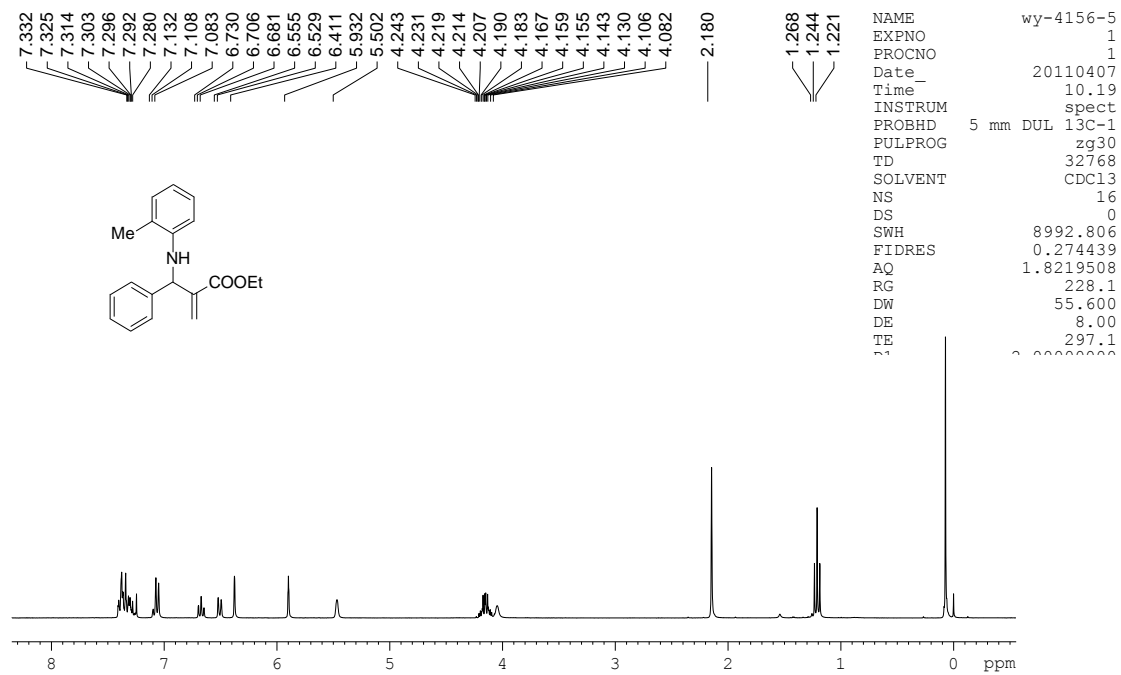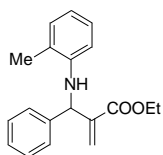

```

NAME      wy-4156-5
EXPNO     1
PROCNO    1
Date_     20110407
Time      10.19
INSTRUM   spect
PROBHD    5 mm DUL 13C-1
PULPROG   zg30
TD         32768
SOLVENT   CDCl3
NS         16
DS         0
SWH        8992.806
FIDRES     0.274439
AQ         1.8219508
RG         228.1
DW         55.600
DE         8.00
TE         297.1
    
```

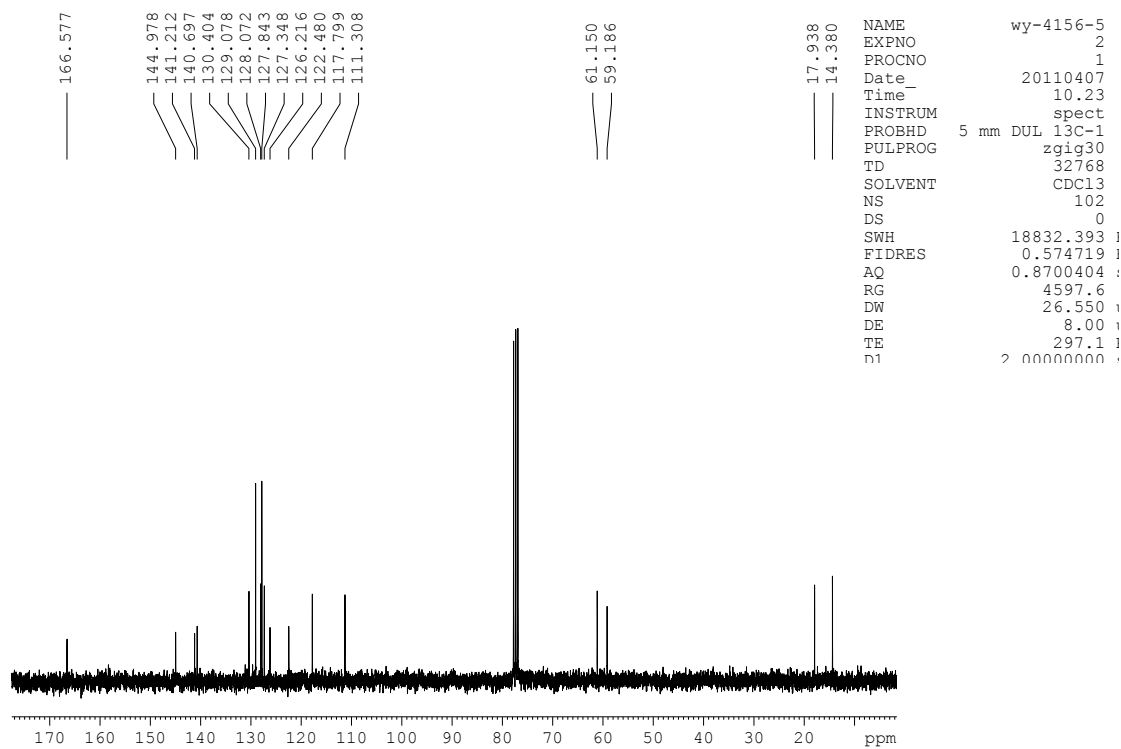

```

NAME      wy-4156-5
EXPNO     2
PROCNO    1
Date_     20110407
Time      10.23
INSTRUM   spect
PROBHD    5 mm DUL 13C-1
PULPROG   zgig30
TD         32768
SOLVENT   CDCl3
NS         102
DS         0
SWH        18832.393
FIDRES     0.574719
AQ         0.8700404
RG         4597.6
DW         26.550
DE         8.00
TE         297.1
    
```

7.358  
7.350  
7.334  
7.322  
7.295  
6.692  
6.687  
6.681  
6.437  
6.431  
6.405  
5.860  
5.361  
5.341  
4.381  
4.361  
4.211  
4.198  
4.187  
4.175  
4.164  
4.151  
4.140  
4.127  
4.116  
4.104

1.238  
1.214  
1.190

```

NAME          wy-4156-8
EXPNO         10
PROCNO        1
Date_         20110408
Time_         18.15
INSTRUM       spect
PROBHD        5 mm DUL 13C-1
PULPROG       zg30
TD            65536
SOLVENT       CDCl3
NS            16
DS            0
SWH           8992.806
FIDRES        0.137219
AQ            3.6438515
RG            322.5
DW            55.600
DE            8.00
TE            298.2
    
```

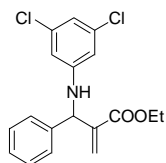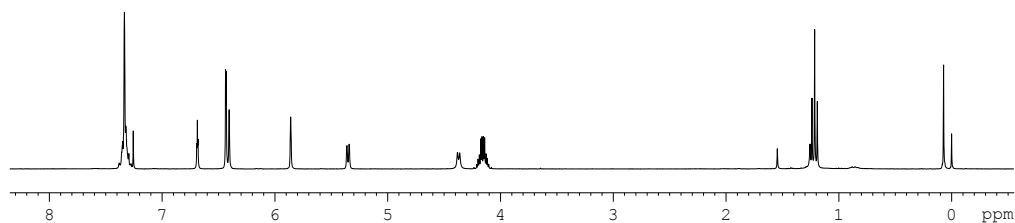

5.00  
0.95  
1.95  
1.04  
1.00  
1.01

0.98  
2.03

3.07

165.855  
148.311  
139.665  
139.582  
135.438  
128.901  
128.103  
127.338  
126.285  
117.713  
111.588

77.442  
77.019  
76.595

61.029  
58.854

14.019

```

NAME          wy-4156-8
EXPNO         11
PROCNO        1
Date_         20110408
Time_         18.19
INSTRUM       spect
PROBHD        5 mm DUL 13C-1
PULPROG       zgig30
TD            32768
SOLVENT       CDCl3
NS            124
DS            0
SWH           18832.393
FIDRES        0.574719
AQ            0.8700404
RG            6502
DW            26.550
DE            8.00
TE            298.3
    
```

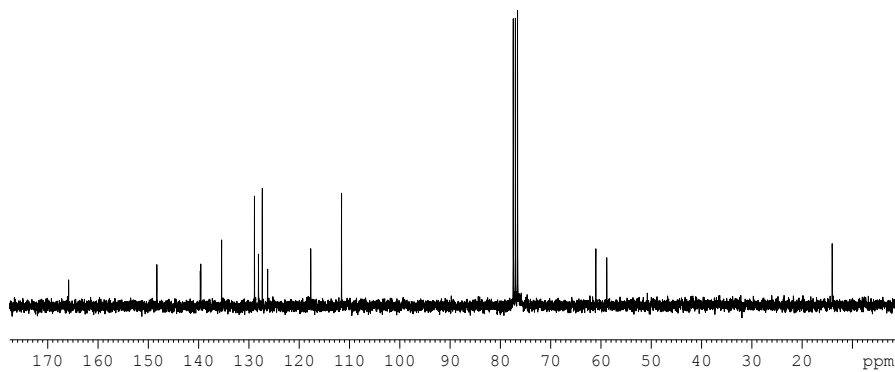



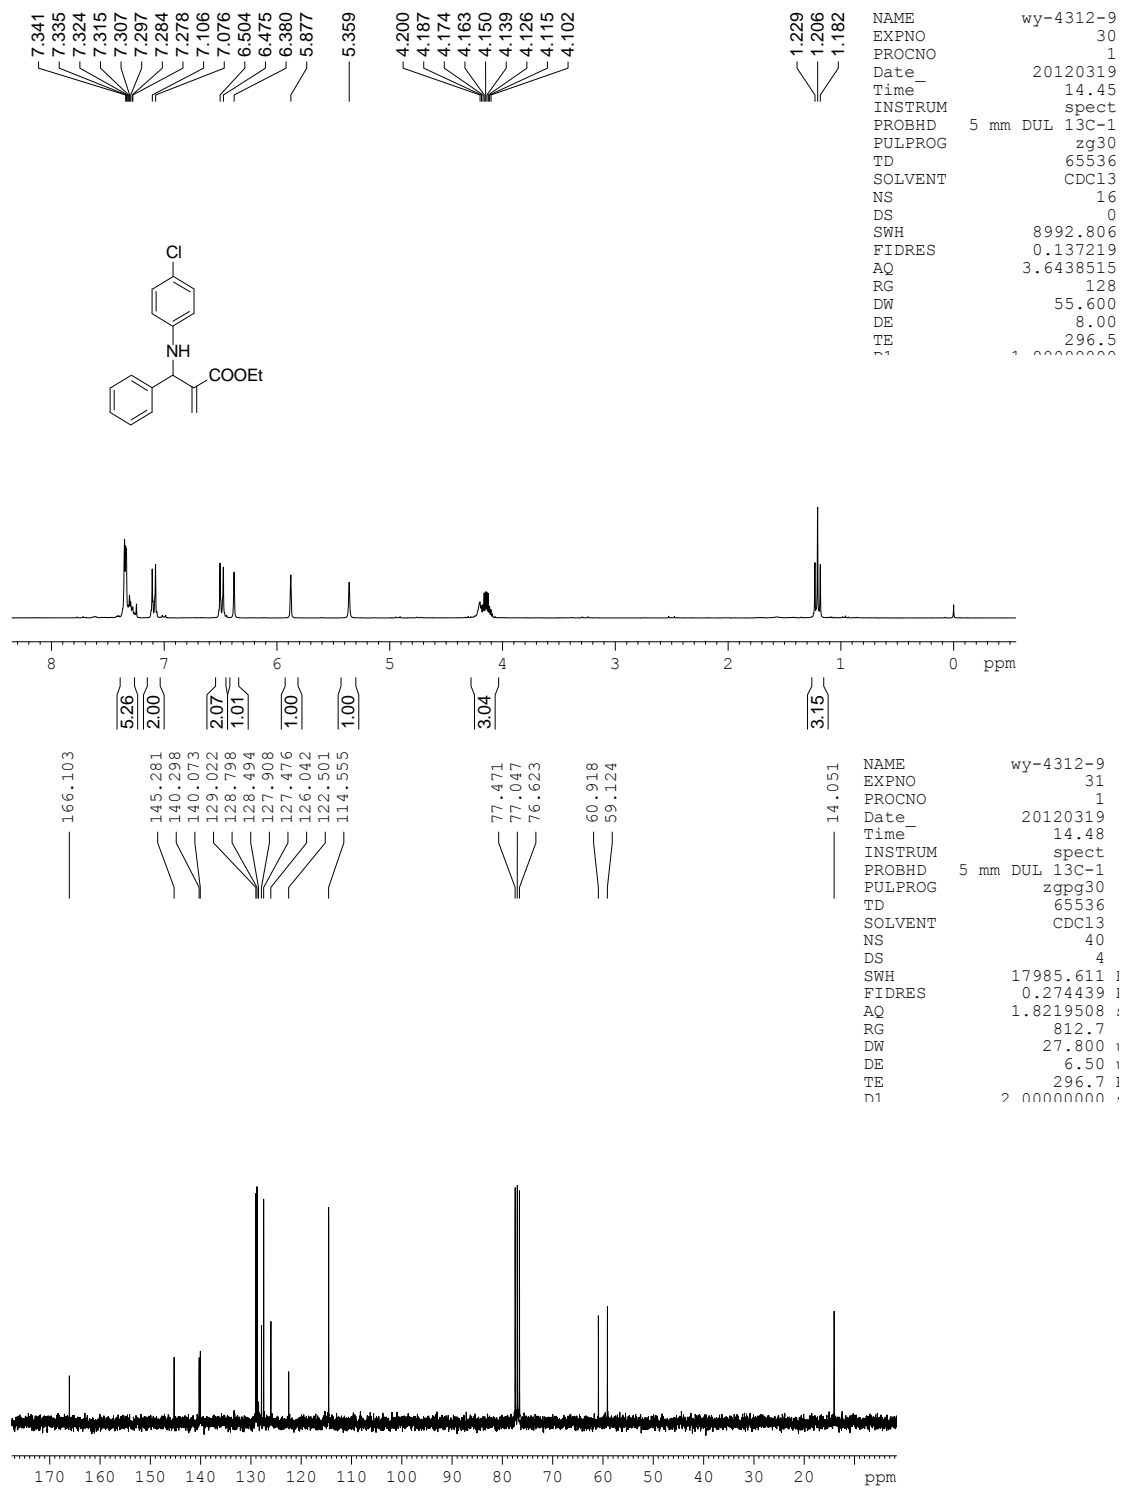

7.322  
7.309  
7.303  
7.298  
7.291  
7.282  
7.269  
6.880  
6.851  
6.822  
6.518  
6.503  
6.496  
6.488  
6.473  
6.375  
5.894  
5.335  
4.181  
4.168  
4.157  
4.144  
4.133  
4.120  
4.109  
4.096  
4.084

1.225  
1.201  
1.177

```

NAME      wy-4312-10
EXPNO     20
PROCNO    1
Date_     20120316
Time_     18.05
INSTRUM   spect
PROBHD    5 mm DUL 13C-1
PULPROG   zg30
TD        65536
SOLVENT   CDCl3
NS         16
DS         0
SWH       8992.806
FIDRES    0.137219
AQ         3.6438515
RG         128
DW         55.600
DE         8.00
TE         295.5
    
```

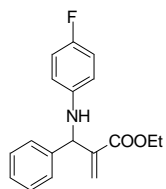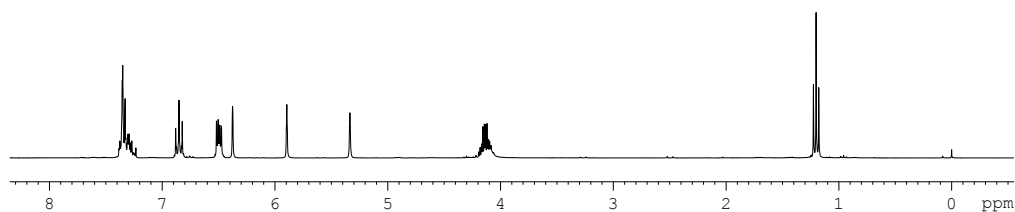

5.21  
1.97  
2.10  
1.00  
1.00  
1.00

3.02

3.09

166.197  
157.565  
154.444  
143.138  
143.113  
140.588  
140.344  
129.278  
128.761  
128.465  
127.837  
127.513  
125.993  
115.766  
115.471  
114.363  
114.265

77.501  
77.078  
76.654

60.884  
59.608

14.059

```

NAME      wy-4312-10
EXPNO     21
PROCNO    1
Date_     20120316
Time_     18.08
INSTRUM   spect
PROBHD    5 mm DUL 13C-1
PULPROG   zgpg30
TD        65536
SOLVENT   CDCl3
NS         51
DS         4
SWH       17985.611
FIDRES    0.274439
AQ         1.8219508
RG         2580.3
DW         27.800
DE         6.50
TE         295.9
    
```

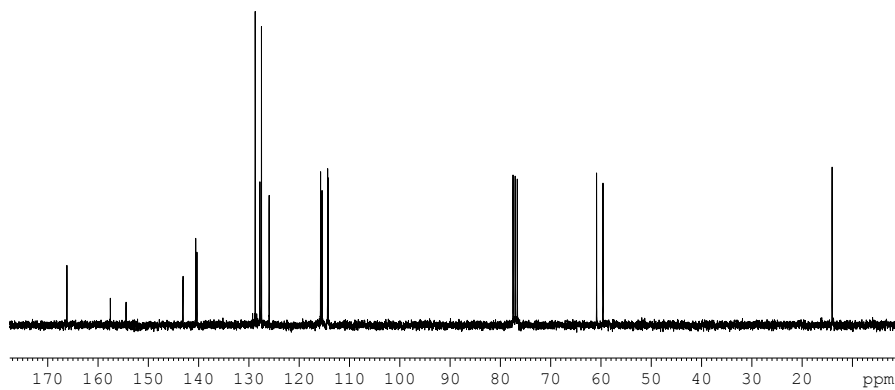

Supplement: c2ob25976a.pdf [file c2ob25976a.pdf]
